# Supplementary material for: Domino enyne metathesis en route to skeletally diverse, privileged scaffolds: synthesis of the tricyclic core of pseudolaric acid F
Source: Royal Society of Chemistry journal article supplement (doi:10.1039/c9qo00477g), 2019-01-01
Supplement: c9qo00477g1.pdf [file c9qo00477g1.pdf]

## Supporting Information

### Domino Enyne Metathesis en Route to Skeletally Diverse, Privileged Scaffolds: Synthesis of Tricyclic Core of Pseudolaric Acid F

Mingui Lin, Hao Cui, Yuhui Hua and Yandong Zhang\*

Department of Chemistry and Key Laboratory of Chemical Biology of Fujian Province, iChEM,  
College of Chemistry and Chemical Engineering, Xiamen University, Xiamen, Fujian 361005,  
China.

Email: [ydzhang@xmu.edu.cn](mailto:ydzhang@xmu.edu.cn)

### Table of Contents

|                                                                                       |     |
|---------------------------------------------------------------------------------------|-----|
| 1. General Information                                                                | S2  |
| 2. General Procedures for the Synthesis of Substrates <b>1a-1r</b>                    | S3  |
| 2.1 Procedures for the preparation of enynes- <b>1b,1c,1d,1e,1f,1g,1h</b>             | S3  |
| 2.2 Procedures for the preparation of enynes- <b>1a,1i,1k,1l,1m,1n,1r</b>             | S8  |
| 2.3 Procedures for the preparation of enynes- <b>1j,1o,1p,1q</b>                      | S20 |
| 3. Optimization of EYM Conditions                                                     | S25 |
| 3.1 Condition screening of EYM                                                        | S25 |
| 3.2 Proposed mechanism of the formation of byproduct <b>3</b>                         | S26 |
| 3.3 Typical procedure for EYM reaction                                                | S27 |
| 4. Characterization of Bicyclic Dienes <b>2a-2r</b>                                   | S28 |
| 5. Syntheses of Skeletally Diverse, Privileged Scaffolds from <b>2g</b> and <b>2h</b> | S36 |
| 6. Construction of the Core Skeleton of Pseudolaric Acid F                            | S40 |
| 7. X-ray Crystal Structures                                                           | S44 |
| 8. Theoretical Calculations                                                           | S47 |
| 9. Reference                                                                          | S50 |
| 10. NMR Spectra Data                                                                  | S51 |

## 1. General Information

All reactions were carried out under an argon atmosphere with dry solvents under anhydrous conditions, unless otherwise stated. All the chemicals were purchased commercially and used without further purification, unless otherwise stated. The boiling point of petroleum ether (PE) is between 60-90 °C. Tetrahydrofuran (THF) was distilled from sodium-benzophenone; Dichloromethane (CH<sub>2</sub>Cl<sub>2</sub>) was distilled from calcium hydride. Toluene was distilled from sodium under argon atmosphere. HMPA was distilled *in vacuo* from calcium hydride; Diisopropylamine (DIPA) was distilled from calcium hydride under argon atmosphere; 1,2-Dichloroethane (DCE) was distilled from calcium hydride under argon atmosphere. Super-dry N,N-Dimethylformamide (DMF) were purchased from Innochem Science & Technology Co., Ltd. Reactions were monitored by thin layer chromatography (TLC) carried out on 0.25mm Qingdao silica gel plates (60F-254) using UV lights as the visualizing agent and KMnO<sub>4</sub>. Flash column chromatography was performed over Qingdao silica gel (200-300 mesh). Infrared spectra were recorded on a Nicolet AVATER FTIR330 spectrometer as thin film and are reported in reciprocal centimeter (cm<sup>-1</sup>). High resolution mass spectra (HRMS) were recorded on a Micromass QTOF2 Quadrupole/Time-of-Flight Tandem mass spectrometer using electron spray ionization. NMR spectra were recorded on Bruker AV-400 and Bruker AV-500 instruments and were calibrated using residual undeuterated solvents (CHCl<sub>3</sub>, δ<sub>H</sub> = 7.26 ppm) and deuterated solvents (CDCl<sub>3</sub>, δ<sub>C</sub> = 77.0 ppm) as internal references. The data for <sup>1</sup>H NMR are reported as follows: chemical shift, multiplicity (s = singlet, d = doublet, t = triplet, m = multiplet or unresolved, brs = broad singlet), coupling constants (Hz) and integration.

## 2. General Procedures for the Synthesis of Substrates

### 2.1) Procedures for the preparation of enyne-1



To a solution of DIPA (31.8 mL, 226.2 mmol) in THF (300 mL) at  $0\text{ }^\circ\text{C}$  was added *n*-BuLi (68 mL, 2.5 M in hexane). After being stirred for 30 min, the reaction was cooled to  $-78\text{ }^\circ\text{C}$ , and then a solution of  $\alpha,\beta$ -unsaturated ester **S1** (17.4 g, 113.1 mmol) in THF (50 mL) was added slowly and the stirring was continued for another 1 h. The distilled HMPA (118.1 mL, 678.6 mmol) was added slowly. The mixture was stirred for another 30 min and the bromide (21.0 mL, 170.0 mmol) in THF (50 mL) was added dropwise. The reaction was stirred for 2 days, and the saturated  $\text{NH}_4\text{Cl}$  solution (150 mL) was

added and the resulting mixture was extracted with Et<sub>2</sub>O. The combined organic layers were washed with brine, dried over MgSO<sub>4</sub> and concentrated *in vacuo*. Purification of the residue by flash chromatography (PE/EtOAc = 100:1) afforded **1b** (22.63 g, 97%) as a colorless oil. The product contained 6.6 mol% of **S2**.

**Ethyl 2-(cyclopent-1-en-1-yl)hex-5-ynoate (1b).** <sup>1</sup>H NMR (400 MHz, CDCl<sub>3</sub>) δ 5.60 – 5.56 (m, 1H), 4.14 (q, *J* = 7.1 Hz, 2H), 3.36 (t, *J* = 7.4 Hz, 1H), 2.35 – 2.24 (m, 4H), 2.20 – 2.14 (m, 2H), 2.07 – 1.98 (m, 1H), 1.96 (t, *J* = 2.6 Hz, 1H), 1.90 – 1.77 (m, 3H), 1.25 (t, *J* = 7.1 Hz, 3H). <sup>13</sup>C NMR (100 MHz, CDCl<sub>3</sub>) δ 173.2, 140.3, 127.9, 83.4, 68.9, 60.5, 46.3, 32.8, 32.3, 28.9, 23.2, 16.4, 14.2. IR (KBr, cm<sup>-1</sup>): 2956, 1732, 1157, 1043, 634. HRMS (ESI, *m/z*) calc for C<sub>13</sub>H<sub>18</sub>O<sub>2</sub> [M+H]<sup>+</sup>: 207.1380, found: 207.1377.



To a suspension of ester **1b** (1.0 g, 4.9 mmol) and NH(OMe)Me·HCl (0.71 g, 7.3 mmol) in THF (50 mL) at 0 °C was added *i*-PrMgCl (7.3 mL, 14.7 mmol, 2 M in THF) over 15 min. The reaction mixture was stirred at 0 °C for 0.5 h before being quenched with a saturated NH<sub>4</sub>Cl solution (20 mL). The mixture was extracted with Et<sub>2</sub>O. The combined organic layers were washed with brine, dried over MgSO<sub>4</sub> and concentrated *in vacuo*. Purification of the residue by flash chromatography (PE/EtOAc = 10:1) afforded **1c** (0.77 g, 72%) as a colorless oil.

**2-(Cyclopent-1-en-1-yl)-N-methoxy-N-methylhex-5-ynamide (1c).** <sup>1</sup>H NMR (500 MHz, CDCl<sub>3</sub>) δ 5.53 – 5.49 (m, 1H), 3.92 – 3.79 (brs, 1H), 3.66 (s, 3H), 3.16 (s, 3H), 2.32 – 2.24 (m, 4H), 2.22 – 2.10 (m, 2H), 2.04 – 1.95 (m, 1H), 1.93 (t, *J* = 2.63 Hz, 1H), 1.86 – 1.72 (m, 3H). <sup>13</sup>C NMR (125 MHz, CDCl<sub>3</sub>) δ 173.9, 141.3, 127.2, 83.9, 68.7, 61.3, 41.8, 33.1, 32.2, 29.1, 23.1, 16.4. IR (KBr, cm<sup>-1</sup>): 2937, 1660, 1383, 992, 629. HRMS (ESI, *m/z*) calc for C<sub>13</sub>H<sub>19</sub>NO<sub>2</sub> [M+Na]<sup>+</sup>: 244.1308, found: 244.1310.



To a stirred suspension of LiAlH<sub>4</sub> (0.20 g, 5.3 mmol) in THF (10 mL) at 0 °C was added dropwise a solution of ester **1b** (1.0 g, 4.9 mmol) in THF (20 mL), and the mixture was stirred for 10 min. The reaction was quenched with saturated NH<sub>4</sub>Cl solution (10 mL). The mixture was extracted with Et<sub>2</sub>O. The organic phase was washed with brine, dried over MgSO<sub>4</sub>, and concentrated *in vacuo*. Purification of the residue by flash chromatography (PE/EtOAc = 10:1) afforded the desired alcohol **S3** (0.63 g, 80%) as a colorless oil.

**2-(Cyclopent-1-en-1-yl)hex-5-yn-1-ol (S3)**. <sup>1</sup>H NMR (500 MHz, CDCl<sub>3</sub>) δ 5.56 (dq, *J* = 3.4, 1.9 Hz, 1H), 3.59 – 3.46 (m, 2H), 2.62 – 2.53 (m, 1H), 2.37 – 2.29 (m, 2H), 2.24 – 2.15 (m, 3H), 2.15 – 2.06 (m, 1H), 1.94 (t, *J* = 2.7 Hz, 1H), 1.90 – 1.83 (m, 2H), 1.70 – 1.55 (m, 2H), 1.45 (t, *J* = 4.7 Hz, 1H). <sup>13</sup>C NMR (125 MHz, CDCl<sub>3</sub>) δ 143.2, 128.1, 84.2, 68.4, 63.9, 43.1, 32.2, 31.8, 28.4, 23.1, 16.3. IR (KBr, cm<sup>-1</sup>): 3291, 2936, 1433, 1039, 639. HRMS (ESI, *m/z*) calc for C<sub>11</sub>H<sub>16</sub>O [M+H]<sup>+</sup>: 165.1274, found: 165.1273.



To a stirred solution of alcohol **S3** (0.10 g, 0.61 mmol) in THF at 0 °C was added TsNHBoc (0.22 g, 0.82 mmol), Diisopropyl azodicarboxylate (DIAD) (0.19 mL, 0.92 mmol) and PPh<sub>3</sub> (0.32 g, 1.22 mmol) successively. The mixture was stirred at 0 °C for 1 h before being quenched with H<sub>2</sub>O and extracted with Et<sub>2</sub>O. The combined organic phases were washed with brine, dried over MgSO<sub>4</sub> and concentrated *in vacuo*. Purification of the residue by flash chromatography (PE/EtOAc = 20:1) afforded **1d** (0.18 g, 71%) as a colorless oil.

**tert-Butyl (2-(cyclopent-1-en-1-yl)hex-5-yn-1-yl)(tosyl)carbamate (1d)**. <sup>1</sup>H NMR (500 MHz, CDCl<sub>3</sub>) δ 7.79 – 7.76 (d, *J* = 8.4 Hz, 2H), 7.30 – 7.27 (d, *J* = 8.4 Hz, 2H),

5.54 – 5.51 (m, 1H), 3.92 – 3.86 (dd,  $J = 14.1, 8.0$  Hz, 1H), 3.81 – 3.75 (dd,  $J = 14.1, 7.0$  Hz, 1H), 3.00 – 2.90 (m, 1H), 2.43 (s, 3H), 2.35 – 2.25 (m, 3H), 2.25 – 2.15 (m, 2H), 2.11 – 2.03 (m, 1H), 1.96 – 1.93 (t,  $J = 2.6$  Hz, 1H), 1.89 – 1.82 (m, 2H), 1.77 – 1.69 (m, 1H), 1.65 – 1.57 (m, 1H), 1.31 (s, 9H).  $^{13}\text{C}$  NMR (125 MHz,  $\text{CDCl}_3$ )  $\delta$  151.1, 144.0, 142.5, 137.6, 129.1, 128.8, 127.9, 84.2, 84.0, 68.4, 49.7, 40.9, 32.2, 31.0, 29.3, 27.8, 23.2, 21.6, 16.4. IR (KBr,  $\text{cm}^{-1}$ ): 3286, 2933, 2847, 1728, 1355, 1088, 545. HRMS (ESI,  $m/z$ ) calc for  $\text{C}_{23}\text{H}_{31}\text{NO}_4\text{S}$   $[\text{M}+\text{Na}]^+$ : 440.1866, found: 440.1870.



To a stirred solution of alcohol **S3** (0.54 g, 3.29 mmol) in  $\text{CH}_2\text{Cl}_2$  (30 mL) at rt was added DIPEA (2.17 mL, 13.2 mmol) and MOMCl (0.75 mL, 9.88 mmol). The reaction mixture was stirred at rt for 2 h before being quenched with saturated  $\text{NaHCO}_3$  solution (10 mL) and extracted with  $\text{CH}_2\text{Cl}_2$ . The combined organic phases were washed with brine, dried over  $\text{MgSO}_4$  and concentrated *in vacuo*. Purification of the residue by flash chromatography (PE/EtOAc = 50:1) afforded **1e** (0.64 g, 94%) as a colorless oil.

**1-(1-(Methoxymethoxy)hex-5-yn-2-yl)cyclopent-1-ene (1e).**  $^1\text{H}$  NMR (400 MHz,  $\text{CDCl}_3$ )  $\delta$  5.49 – 5.45 (m, 1H), 4.59 (s, 2H), 3.51 (dd,  $J = 9.6, 6.6$  Hz, 1H), 3.45 (dd,  $J = 9.6, 6.6$  Hz, 1H), 3.33 (s, 3H), 2.68 – 2.59 (m, 1H), 2.32 – 2.26 (m, 2H), 2.23 – 2.09 (m, 4H), 1.92 (t,  $J = 2.7$  Hz, 1H), 1.86 – 1.73 (m, 3H), 1.62 – 1.52 (m, 1H).  $^{13}\text{C}$  NMR (100 MHz,  $\text{CDCl}_3$ )  $\delta$  143.5, 126.4, 96.4, 84.3, 69.9, 68.2, 55.1, 40.3, 32.1, 32.0, 28.9, 23.1, 16.2. IR (KBr,  $\text{cm}^{-1}$ ): 3312, 2925, 2852, 1463, 1045, 630. HRMS (ESI,  $m/z$ ) calc for  $\text{C}_{13}\text{H}_{20}\text{O}_2$   $[\text{M}+\text{Na}]^+$ : 231.1356, found: 231.1356.



To a stirred solution of alcohol **S3** (0.4 g, 2.4 mmol) in CH<sub>2</sub>Cl<sub>2</sub> (20 mL) at rt was added Et<sub>3</sub>N (0.68 mL, 4.9 mmol) and DMAP (0.03 g, 0.24 mmol) and acetic anhydride (0.35 mL, 3.7 mmol) in sequence. The reaction mixture was stirred at rt for 3 h before being quenched with saturated NaHCO<sub>3</sub> solution (10 mL), and extracted with CH<sub>2</sub>Cl<sub>2</sub>. The combined organic phases were washed with brine, dried over MgSO<sub>4</sub> and concentrated *in vacuo*. Purification of the residue by flash chromatography (PE/EtOAc = 100:1) afforded **1f** (0.40 g, 80%) as a colorless oil.

**2-(Cyclopent-1-en-1-yl)hex-5-yn-1-yl acetate (1f).** <sup>1</sup>H NMR (400 MHz, CDCl<sub>3</sub>) δ 5.48 (s, 1H), 4.07 (dd, *J* = 10.8, 6.6 Hz, 1H), 3.99 (dd, *J* = 10.8, 6.9 Hz, 1H), 2.77 – 2.59 (m, 1H), 2.32 – 2.25 (m, 2H), 2.24 – 2.05 (m, 4H), 2.02 (s, 3H), 1.93 (t, *J* = 2.6 Hz, 1H), 1.87 – 1.78 (m, 2H), 1.76 – 1.54 (m, 2H). <sup>13</sup>C NMR (100 MHz, CDCl<sub>3</sub>) δ 170.9, 142.5, 127.1, 84.0, 68.5, 66.2, 39.4, 32.2, 32.2, 28.9, 23.2, 20.9, 16.2. IR (KBr, cm<sup>-1</sup>): 2950, 1741, 1365, 1240, 1037, 634. HRMS (ESI, *m/z*) calc for C<sub>13</sub>H<sub>18</sub>O<sub>2</sub> [M+Na]<sup>+</sup>: 229.1199, found: 229.1196.



To a stirred solution of alcohol **S3** (0.63 g, 3.8 mmol) in CH<sub>2</sub>Cl<sub>2</sub> (20 mL) was treated with TBDPSCl (1.31 mL, 5.0 mmol), imidazole (0.53 g, 7.7 mmol), and a catalytic amount of DMAP. The reaction mixture was stirred at rt for 0.5 h before being quenched with H<sub>2</sub>O (20 mL). The resulting mixture was extracted with CH<sub>2</sub>Cl<sub>2</sub>. The combined organic layer was washed with brine, dried over MgSO<sub>4</sub> and concentrated *in vacuo*. Purification of the residue by column chromatography (PE/EtOAc = 100:1) afforded **1g** (1.45 g, 94%) as a colorless oil.

**tert-Butyl((2-(cyclopent-1-en-1-yl)hex-5-yn-1-yl)oxy)diphenylsilane (1g).** <sup>1</sup>H NMR (500 MHz, CDCl<sub>3</sub>) δ 7.70 – 7.66 (m, 4H), 7.45 – 7.38 (m, 6H), 5.47 – 5.43 (m, 1H), 3.63 (qd, *J* = 9.9, 6.3 Hz, 2H), 2.61 – 2.54 (m, 1H), 2.33 – 2.28 (m, 2H), 2.24 – 2.07 (m, 4H), 1.95 (t, *J* = 2.6 Hz, 1H), 1.92 – 1.79 (m, 3H), 1.68 – 1.59 (m, 1H), 1.07 (s, 9H).

$^{13}\text{C}$  NMR (125 MHz,  $\text{CDCl}_3$ )  $\delta$  143.8, 135.6, 135.6, 133.9, 133.9, 129.5, 129.5, 127.6, 126.2, 84.8, 68.1, 66.1, 42.8, 32.6, 32.2, 28.8, 26.8, 23.2, 19.3, 16.4. IR (KBr,  $\text{cm}^{-1}$ ): 2930, 1427, 1111, 701, 504. HRMS (ESI,  $m/z$ ) calc for  $\text{C}_{27}\text{H}_{34}\text{OSi}$   $[\text{M}+\text{Na}]^+$ : 425.2271, found: 425.2274.



To a stirred solution of alcohol **S3** (1.97 g, 12.0 mmol) in  $\text{CH}_2\text{Cl}_2$  (40 mL) was added TBSCl (2.72 g, 18.1 mmol), imidazole (1.64 g, 24.1 mmol), and a catalytic amount of DMAP in sequence. The reaction mixture was stirred at rt for 0.5 h before being quenched with  $\text{H}_2\text{O}$  (40 mL). The resulting mixture was extracted with  $\text{CH}_2\text{Cl}_2$ . The combined organic layer was washed with brine, dried over  $\text{MgSO}_4$  and concentrated *in vacuo*. Purification of the residue by column chromatography (PE/EtOAc = 100:1) afforded **1h** (3.12 g, 93%) as a colorless oil.

**tert-Butyl((2-(cyclopent-1-en-1-yl)hex-5-yn-1-yl)oxy)dimethylsilane (1h).**  $^1\text{H}$  NMR (500 MHz,  $\text{CDCl}_3$ )  $\delta$  5.44 – 5.41 (m, 1H), 3.59 (dd,  $J = 9.9, 5.7$  Hz, 1H), 3.50 (dd,  $J = 9.9, 7.1$  Hz, 1H), 2.52 – 2.44 (m, 1H), 2.31 – 2.26 (m, 2H), 2.24 – 2.15 (m, 3H), 2.13 – 2.04 (m, 1H), 1.92 (t,  $J = 2.7$  Hz, 1H), 1.86 – 1.77 (m, 3H), 1.60 – 1.53 (m, 1H), 0.88 (s, 9H), 0.03 (s, 6H).  $^{13}\text{C}$  NMR (125 MHz,  $\text{CDCl}_3$ )  $\delta$  144.0, 126.0, 84.8, 68.0, 65.6, 43.0, 32.7, 32.2, 28.9, 25.9, 23.3, 18.3, 16.4, -5.4. IR (KBr,  $\text{cm}^{-1}$ ): 2929, 2856, 1254, 1110, 836, 628. HRMS (ESI,  $m/z$ ) calc for  $\text{C}_{17}\text{H}_{30}\text{OSi}$   $[\text{M}+\text{H}]^+$ : 279.2139, found: 279.2136.

## 2.2) Procedures for the preparation of enynes-1r,1n,1s,1i,1k,1l,1m,1a



To a stirred solution of DIPA (0.58 mL, 4.11 mmol) in THF (40 mL) at 0 °C was added *n*-BuLi (1.64 mL, 2.5 M in hexane). After 30 min, the reaction was cooled to -78 °C, and then a solution of ethyl isobutyrate (0.48 g, 4.11 mmol) in THF was added slowly and the stirring was continued for another 1 h. The 1-(bromomethyl)cyclopent-1-ene (0.508 g, 3.16 mmol) in THF was added dropwise. The reaction was stirred for 2h at this temperature before being quenched with saturated NH<sub>4</sub>Cl solution (20 mL) and extracted with Et<sub>2</sub>O. The combined organic layers were washed with brine, dried over MgSO<sub>4</sub> and concentrated *in vacuo*. Purification of the residue by column chromatography (PE/EtOAc = 100:1) afforded **S4** (0.50 g, 2.55 mmol).



**Ethyl 3-(cyclopent-1-en-1-yl)-2,2-dimethylpropanoate (S4).** All spectral data were in agreement with reported values.<sup>1</sup>



**Step 1.** To a stirred solution of DIPA (1.3 equiv) in THF (0.2 M) at 0 °C was added *n*-BuLi (1.3 equiv, 2.5 M in hexane). After 30 min, the reaction was cooled to -78 °C, and then a solution of ethyl isobutyrate (1.3 equiv) in THF was added slowly and the stirring was continued for another 1 h. The ketone (1.0 equiv) in THF was added dropwise. The reaction was stirred for 2h before being quenched with saturated NH<sub>4</sub>Cl solution and extracted with Et<sub>2</sub>O. The combined organic layers were washed with brine, dried over MgSO<sub>4</sub> and concentrated *in vacuo* to afford the crude aldol products which was used

for next step without further purification.

**Step 2.** To a stirred solution of the alcohol (1.0 equiv) in CH<sub>2</sub>Cl<sub>2</sub> (0.3 M) and pyridine (3.0 equiv) at 0 °C was added SOCl<sub>2</sub> (1.5 equiv). The mixture was stirred for 1 h at this temperature, then poured into ice water and stirred for an additional 20 min at rt. The two-phase system was extracted with CH<sub>2</sub>Cl<sub>2</sub>. The combined extracts were washed with brine, dried over MgSO<sub>4</sub> and concentrated *in vacuo* to afford the unsaturated ester.

**Step 3.** To a stirred suspension of LiAlH<sub>4</sub> (1.1 equiv) in THF at 0 °C was added a solution of above unsaturated ester (1.0 equiv) in THF (0.1 M) dropwise. The mixture was stirred for 10 min before being quenched with H<sub>2</sub>O and extracted with Et<sub>2</sub>O. The combined organic layers were washed with brine, dried over MgSO<sub>4</sub> and concentrated *in vacuo* to afford the reduction product alcohol.

**Step 4.** To alcohol (1.0 equiv) in EtOAc (0.3 M) was added IBX (1.5 equiv.). The resulting suspension was immersed in an oil bath preheated to 80 °C and stirred vigorously open to the air atmosphere. After being stirred for 4 h, the reaction was cooled to rt and filtered. The filter cake was washed with EtOAc, and the combined filtrates were concentrated *in vacuo*. Purification of the residue by column chromatography (PE/EtOAc = 100:1) afforded aldehyde.

**Step 5.** Epoxide formation method I: To a stirred solution of trimethylsulfonium iodide (2.5 equiv) in THF (0.1 M) was added sodium hydride (60% in mineral oil, 3.0 equiv) and the reaction mixture was heated to reflux for 1 h. A solution of aldehyde (1.0 equiv) in THF was added dropwise. After 4 h, the reaction was cooled to rt and was quenched with saturated NH<sub>4</sub>Cl solution and extracted with Et<sub>2</sub>O. The combined organic layers were washed with brine, dried over MgSO<sub>4</sub> and concentrated *in vacuo*. Purification of the residue by column chromatography (PE/EtOAc = 100:1) afforded the epoxide.

Epoxide formation method II: To a stirred solution of aldehyde (1.0 equiv) and dibromomethane (1.3 equiv) in THF (0.1 M) at  $-78\text{ }^{\circ}\text{C}$  was added dropwise *n*-BuLi (1.3 equiv, 2.5 M in hexane).<sup>3</sup> The resulting pale yellow mixture was stirred for overnight while allowing the bath temperature to rise to rt. The reaction was then quenched with saturated  $\text{NH}_4\text{Cl}$  solution and extracted with  $\text{Et}_2\text{O}$ . The combined organic layers were washed with brine, dried over  $\text{MgSO}_4$  and concentrated *in vacuo*. Purification of the residue by column chromatography (PE/EtOAc = 100:1) afforded the epoxide.

**Step 6.** To a solution of trimethylsilylacetylene (2.5 equiv) and THF (0.1 M) at  $-78\text{ }^{\circ}\text{C}$  was added *n*-BuLi (2.5 equiv, 2.5 M in hexane) dropwise. The resulting solution was stirred at the same temperature for 30 min before the addition of  $\text{BF}_3\cdot\text{OEt}_2$  (1.0 equiv). After being stirring for an additional 10 min at  $-78\text{ }^{\circ}\text{C}$ , a solution of epoxide (1.0 equiv) in THF was added dropwise via syringe. When TLC analysis indicated complete consumption of the epoxide, the reaction was quenched with saturated  $\text{NaHCO}_3$  solution and extracted with  $\text{Et}_2\text{O}$ . The combined organic layers were washed with brine, dried with  $\text{MgSO}_4$  and concentrated *in vacuo* to give the crude enyne alcohol.

To a stirred solution of enyne (1.0 equiv) in THF (0.3 M) was added TBAF (1.5 equiv, 1.0 M in THF), and the resulting mixture was stirred at rt for 0.5 h. The reaction was quenched with  $\text{H}_2\text{O}$  and extracted with ether. The combined organic layers were washed with brine, dried over  $\text{MgSO}_4$  and concentrated *in vacuo*. Purification of the residue by column chromatography (PE/EtOAc = 20:1) afforded the alkyne alcohol.

**Step 7.** To a solution of above alcohol (1.0 equiv)  $\text{CH}_2\text{Cl}_2$  (0.1 M) at  $0\text{ }^{\circ}\text{C}$  was added imidazole (2.5 equiv), DMAP (0.1 equiv) and  $\text{TMSCl}$  (2.0 equiv) in sequence. After being stirred for 0.5 h, the reaction mixture was poured into  $\text{H}_2\text{O}$  and extracted with  $\text{CH}_2\text{Cl}_2$ . The combined organic layers were washed with brine, dried over  $\text{MgSO}_4$  and concentrated *in vacuo*. Purification of the residue by column chromatography (PE/EtOAc = 100:1) afforded the siloxane.



**3-(Cyclobut-1-en-1-yl)-2,2-dimethylpropanal (S5).** It was used without further purification immediately because it was instable.



**2-(Cyclopent-1-en-1-yl)-2-methylpropanal (S6).** 3.00 g (21.74 mmol) of **S6** was prepared from 3.62 g (43.04 mmol) of cyclopentanone (51% yield). All spectral data were in agreement with reported values.<sup>2</sup>



**2-(Cyclohex-1-en-1-yl)-2-methylpropanal (S7).** 4.30 g (28.29 mmol) of **S7** was prepared from 3.0 g (30.55 mmol) of cyclohexanone (93% yield). <sup>1</sup>H NMR (500 MHz, CDCl<sub>3</sub>) δ 9.25 (s, 1H), 5.61 – 5.55 (m, 1H), 2.10 – 2.03 (m, 2H), 1.87 – 1.81 (m, 2H), 1.62 – 1.50 (m, 4H), 1.14 (s, 6H). <sup>13</sup>C NMR (125 MHz, CDCl<sub>3</sub>) δ 203.4, 137.0, 124.6, 51.6, 25.7, 25.2, 23.0, 22.1, 20.3. IR (KBr, cm<sup>-1</sup>): 2930, 1727, 1137, 919, 555. HRMS (ESI, m/z) calc for C<sub>10</sub>H<sub>16</sub>O [M+H]<sup>+</sup>: 153.1274, found: 153.1274.



**3-(Cyclopent-1-en-1-yl)-2,2-dimethylpropanal (S8).** 0.68 g (4.47 mmol) of **S8** was prepared from 1.33 g (6.79 mmol) from the corresponding ester (66% yield). All spectral data were in agreement with reported values.<sup>1</sup>



**2-(1*H*-Inden-2-yl)-2-methylpropanal (S9).** 1.94 g (10.43 mmol) of **S9** was prepared from 2.28 g (17.27 mmol) of 1,3-dihydro-2*H*-inden-2-one (60% yield). <sup>1</sup>H NMR (400 MHz, CDCl<sub>3</sub>) δ 9.47 (s, 1H), 7.46 – 7.41 (m, 1H), 7.38 (d, *J* = 7.5 Hz, 1H), 7.31 – 7.26 (m, 1H), 7.22 – 7.17 (m, 1H), 6.78 – 6.75 (m, 1H), 3.37 – 3.35 (m, 2H), 1.45 (s, 6H). <sup>13</sup>C NMR (100 MHz, CDCl<sub>3</sub>) δ 201.3, 148.9, 144.3, 143.2, 128.9, 126.4, 124.6, 123.6, 120.7, 49.1, 38.5, 21.7. IR (KBr, cm<sup>-1</sup>): 2971, 1722, 1462, 913, 753. HRMS (ESI, *m/z*) calc for C<sub>13</sub>H<sub>14</sub>O [M+Na]<sup>+</sup>: 209.0937, found: 209.0937.



**2-(1*H*-Inden-3-yl)-2-methylpropanal (S10).** 4.09 g (22.0 mmol) of **S10** was prepared from 3.0 g (22.72 mmol) of 2,3-dihydro-1*H*-inden-1-one (97% yield). <sup>1</sup>H NMR (400 MHz, CDCl<sub>3</sub>) δ 9.58 (s, 1H), 7.49 (d, *J* = 7.2 Hz, 1H), 7.32 (d, *J* = 7.3 Hz, 1H), 7.29 – 7.19 (m, 2H), 6.48 (t, *J* = 1.9 Hz, 1H), 3.41 (d, *J* = 1.5 Hz, 2H), 1.51 (s, 6H). <sup>13</sup>C NMR (100 MHz, CDCl<sub>3</sub>) δ 203.1, 145.0, 144.9, 142.8, 130.6, 126.1, 124.8, 124.1, 121.0, 48.4, 37.7, 21.2. IR (KBr, cm<sup>-1</sup>): 2972, 1731, 1459, 903, 766. HRMS (ESI, *m/z*) calc for C<sub>13</sub>H<sub>14</sub>O [M+Na]<sup>+</sup>: 209.0937, found: 209.0938.



**2-(7-Methoxy-1*H*-inden-3-yl)-2-methylpropanal (S11).** 2.40 g (11.11 mmol) of **S11** was prepared from 3.12 g (19.23 mmol) of 4-methoxy-2,3-dihydro-1*H*-inden-1-one (58%

yield).  $^1\text{H}$  NMR (400 MHz,  $\text{CDCl}_3$ )  $\delta$  9.57 (s, 1H), 7.26 (t,  $J = 7.9$  Hz, 1H), 6.97 (d,  $J = 7.6$  Hz, 1H), 6.78 (d,  $J = 8.2$  Hz, 1H), 6.48 (t,  $J = 1.9$  Hz, 1H), 3.90 (s, 3H), 3.37 (d,  $J = 1.8$  Hz, 2H), 1.50 (s, 6H).  $^{13}\text{C}$  NMR (101 MHz,  $\text{CDCl}_3$ )  $\delta$  203.2, 155.4, 144.9, 144.6, 131.8, 130.7, 127.8, 114.1, 107.2, 55.1, 48.4, 35.0, 21.2. IR (KBr,  $\text{cm}^{-1}$ ): 2971, 1727, 1478, 1259, 776. HRMS (ESI,  $m/z$ ) calc for  $\text{C}_{14}\text{H}_{16}\text{O}$   $[\text{M}+\text{Na}]^+$ : 239.1043, found: 239.1041.



**2-(Cyclobut-1-en-1-yl)-2-methylhex-5-yn-3-ol (S12).** 1.07 g (6.52 mmol) of **S12** was prepared from 2.8 g (40.0 mmol) of cyclobutanone (16% yield) via **step 5**, method I, and the 2-(cyclobut-1-en-1-yl)-2-methylpropanal intermediate was unstable.  $^1\text{H}$  NMR (500 MHz,  $\text{CDCl}_3$ )  $\delta$  5.77 (t,  $J = 0.8$  Hz, 1H), 3.65 – 3.60 (m, 1H), 2.50 – 2.40 (m, 3H), 2.31 – 2.22 (m, 3H), 2.07 (d,  $J = 3.6$  Hz, 1H), 2.05 (t,  $J = 2.6$  Hz, 1H), 1.03 (s, 3H), 1.01 (s, 3H).  $^{13}\text{C}$  NMR (125 MHz,  $\text{CDCl}_3$ )  $\delta$  154.9, 127.9, 82.3, 75.2, 70.2, 40.5, 29.0, 25.7, 22.6, 21.5, 20.9. IR (KBr,  $\text{cm}^{-1}$ ): 3308, 2920, 1362, 1061, 857, 632. HRMS (ESI,  $m/z$ ) calc for  $\text{C}_{11}\text{H}_{16}\text{O}$   $[\text{M}+\text{Na}]^+$ : 187.1093, found: 187.1092.



**2-(Cyclopent-1-en-1-yl)-2-methylhex-5-yn-3-ol (S13).** 0.50g (2.81 mmol) of **S13** was prepared from 1.0 g (5.37 mmol) of the corresponding aldehyde (52% yield) via **step 5**, method I.  $^1\text{H}$  NMR (400 MHz,  $\text{CDCl}_3$ )  $\delta$  5.50 – 5.45 (m, 1H), 3.69 (dt,  $J = 9.7, 3.0$  Hz, 1H), 2.36 – 2.15 (m, 6H), 2.05 – 2.00 (m, 2H), 1.87 – 1.77 (m, 2H), 1.08 (s, 3H), 1.04 (s, 3H).  $^{13}\text{C}$  NMR (100 MHz,  $\text{CDCl}_3$ )  $\delta$  149.7, 125.1, 82.6, 74.9, 69.9, 40.6, 32.1, 31.8, 23.6, 23.0, 22.3, 21.9. IR (KBr,  $\text{cm}^{-1}$ ): 3308, 2964, 1362, 1064, 958, 632. HRMS (ESI,  $m/z$ ) calc for  $\text{C}_{12}\text{H}_{18}\text{O}$   $[\text{M}+\text{Na}]^+$ : 201.1250, found: 201.1248.



**2-(Cyclohex-1-en-1-yl)-2-methylhex-5-yn-3-ol (S14).** 0.46 g (2.4 mmol) of **S14** was prepared from 1.0 g (6.58 mmol) the corresponding aldehyde (36% yield) via **step 5** method I.  $^1\text{H}$  NMR (500 MHz,  $\text{CDCl}_3$ )  $\delta$  5.59 – 5.55 (m, 1H), 3.71 (dt,  $J = 9.8, 2.7$  Hz, 1H), 2.36 – 2.30 (m, 1H), 2.23 – 2.16 (m, 1H), 2.07 – 1.99 (m, 5H), 1.96 – 1.88 (m, 1H), 1.66 – 1.48 (m, 4H), 1.03 (s, 3H), 0.99 (s, 3H).  $^{13}\text{C}$  NMR (100 MHz,  $\text{CDCl}_3$ )  $\delta$  141.7, 122.5, 82.8, 74.5, 69.8, 43.1, 25.6, 24.7, 23.3, 22.3, 22.1, 21.5. IR (KBr,  $\text{cm}^{-1}$ ): 3308, 2927, 1384, 1061, 921, 632. HRMS (ESI,  $m/z$ ) calc for  $\text{C}_{13}\text{H}_{20}\text{O}$   $[\text{M}+\text{Na}]^+$ : 215.1406, found: 215.1406.



**1-(Cyclopent-1-en-1-yl)-2,2-dimethylhex-5-yn-3-ol (S15).** 0.41 g (2.14 mmol) of **S15** from 0.66 g (4.34 mmol) of the corresponding aldehyde (49% yield) via **step 5**, method I.  $^1\text{H}$  NMR (500 MHz,  $\text{CDCl}_3$ )  $\delta$  5.44 – 5.40 (m, 1H), 3.55 – 3.50 (m, 1H), 2.46 – 2.41 (m, 1H), 2.31 – 2.24 (m, 5H), 2.21 (d,  $J = 13.1$  Hz, 1H), 2.15 (d,  $J = 3.7$  Hz, 1H), 2.06 – 2.00 (m, 2H), 1.88 – 1.80 (m, 2H), 0.91 (s, 3H), 0.88 (s, 3H).  $^{13}\text{C}$  NMR (125 MHz,  $\text{CDCl}_3$ )  $\delta$  141.6, 128.4, 82.5, 76.3, 70.3, 40.4, 38.1, 37.6, 32.4, 24.1, 23.8, 22.9, 22.3. IR (KBr,  $\text{cm}^{-1}$ ): 3308, 2954, 1384, 1061, 844, 633. HRMS (ESI,  $m/z$ ) calc for  $\text{C}_{13}\text{H}_{20}\text{O}$   $[\text{M}+\text{Na}]^+$ : 215.1406, found: 215.1405.



**2-(1H-Inden-2-yl)-2-methylhex-5-yn-3-ol (S16).** 0.60 g (2.65 mmol) of **S16** was prepared from 1.0 g (5.38 mmol) of the corresponding aldehyde (49% yield) via **step 5**, method I.  $^1\text{H}$  NMR (400 MHz,  $\text{CDCl}_3$ )  $\delta$  7.41 (d,  $J = 7.3$  Hz, 1H), 7.33 (d,  $J = 7.4$  Hz, 1H), 7.29 – 7.22 (m, 1H), 7.15 (td,  $J = 7.4, 1.1$  Hz, 1H), 6.64 (s, 1H), 3.83 (dd,  $J =$

9.8, 2.8 Hz, 1H), 3.45 (q,  $J = 22.6$  Hz, 2H), 2.39 (dt,  $J = 16.8, 2.7$  Hz, 1H), 2.28 – 2.11 (m, 2H), 2.04 (t,  $J = 2.6$  Hz, 1H), 1.29 (d,  $J = 5.5$  Hz, 6H).  $^{13}\text{C}$  NMR (100 MHz,  $\text{CDCl}_3$ )  $\delta$  155.1, 144.6, 143.2, 127.1, 126.3, 124.2, 123.5, 120.4, 82.1, 76.5, 70.5, 41.1, 38.8, 24.6, 23.2, 22.8. IR (KBr,  $\text{cm}^{-1}$ ): 3292, 2966, 1390, 1066, 753, 718, 635. HRMS (ESI,  $m/z$ ) calc for  $\text{C}_{16}\text{H}_{18}\text{O}$   $[\text{M}+\text{Na}]^+$ : 249.1250, found: 249.1247.



**2-(1H-Inden-3-yl)-2-methylhex-5-yn-3-ol (S17).** 0.62 g (2.74 mmol) of **S17** was prepared from 2.0 g (10.57 mmol) of the corresponding aldehyde (26% yield) via **step 5**, method II.  $^1\text{H}$  NMR (400 MHz,  $\text{CDCl}_3$ )  $\delta$  7.67 (d,  $J = 7.7$  Hz, 1H), 7.51 – 7.46 (m, 1H), 7.32 – 7.27 (m, 1H), 7.21 (td,  $J = 7.4, 0.9$  Hz, 1H), 6.35 (t,  $J = 2.1$  Hz, 1H), 4.46 – 4.32 (m, 1H), 3.34 (d,  $J = 1.5$  Hz, 2H), 2.33 – 2.28 (m, 2H), 2.15 (d,  $J = 3.5$  Hz, 1H), 2.02 (t,  $J = 2.6$  Hz, 1H), 1.45 (s, 3H), 1.38 (s, 3H).  $^{13}\text{C}$  NMR (100 MHz,  $\text{CDCl}_3$ )  $\delta$  149.7, 145.6, 143.1, 129.8, 125.8, 124.4, 124.1, 122.2, 82.3, 73.9, 70.3, 41.4, 37.4, 23.6, 22.7, 21.8. IR (KBr,  $\text{cm}^{-1}$ ): 3292, 2971, 1391, 1065, 767, 722, 639. HRMS (ESI,  $m/z$ ) calc for  $\text{C}_{16}\text{H}_{18}\text{O}$   $[\text{M}+\text{Na}]^+$ : 249.1250, found: 249.1248.



**2-(7-Methoxy-1H-inden-3-yl)-2-methylhex-5-yn-3-ol (S18).** 0.50 g (1.95 mmol) of **S18** was prepared from 1.36 g (6.27 mmol) the corresponding aldehyde (31% yield) via **step 5**, method II.  $^1\text{H}$  NMR (500 MHz,  $\text{CDCl}_3$ )  $\delta$  7.31 – 7.25 (m, 2H), 6.77 (dd,  $J = 7.5, 1.2$  Hz, 1H), 6.34 (t,  $J = 2.1$  Hz, 1H), 4.40 – 4.33 (m, 1H), 3.89 (s, 3H), 3.31 – 3.26 (m, 2H), 2.33 – 2.24 (m, 2H), 2.12 (d,  $J = 3.4$  Hz, 1H), 2.01 (t,  $J = 2.7$  Hz, 1H), 1.43 (s, 3H), 1.36 (s, 3H).  $^{13}\text{C}$  NMR (125 MHz,  $\text{CDCl}_3$ )  $\delta$  155.4, 149.7, 144.9, 132.7, 129.9, 127.5, 115.5, 106.9, 82.4, 74.0, 70.3, 55.2, 41.3, 34.6, 23.8, 22.7, 21.8. IR (KBr,  $\text{cm}^{-1}$ ):

3290, 2969, 1477, 1256, 1020, 775. HRMS (ESI,  $m/z$ ) calc for  $C_{17}H_{20}O_2$   $[M+Na]^+$ : 279.1356, found: 279.1353.



**((2-(Cyclobut-1-en-1-yl)-2-methylhex-5-yn-3-yl)oxy)trimethylsilane (1m).** 1.15 g (4.87 mmol) of **1m** was prepared from 1.07 g (6.52 mmol) of alcohol **S14** (75% yield).  $^1H$  NMR (500 MHz,  $CDCl_3$ )  $\delta$  5.69 (t,  $J = 0.8$  Hz, 1H), 3.66 (dd,  $J = 8.6, 2.8$  Hz, 1H), 2.44 – 2.37 (m, 3H), 2.29 – 2.25 (m, 2H), 2.20 – 2.13 (m, 1H), 1.96 (t,  $J = 2.7$  Hz, 1H), 0.98 (s, 3H), 0.94 (s, 3H), 0.16 (s, 9H).  $^{13}C$  NMR (125 MHz,  $CDCl_3$ )  $\delta$  155.5, 127.0, 84.0, 77.7, 69.4, 41.3, 29.1, 25.7, 23.8, 23.8, 19.8, 0.7. IR (KBr,  $cm^{-1}$ ): 2958, 1250, 1105, 929, 841, 635. HRMS (ESI,  $m/z$ ) calc for  $C_{14}H_{24}OSi$   $[M+Na]^+$ : 259.1489, found: 259.1486.



**((2-(Cyclopent-1-en-1-yl)-2-methylhex-5-yn-3-yl)oxy)trimethylsilane (1a).** 0.47 g (1.89 mmol) of **1a** was prepared from 0.37 g (2.05 mmol) of alcohol **S15** (92% yield).  $^1H$  NMR (400 MHz,  $CDCl_3$ )  $\delta$  5.42 – 5.37 (m, 1H), 3.75 (dd,  $J = 8.8, 2.5$  Hz, 1H), 2.35 – 2.16 (m, 5H), 2.15 – 2.04 (m, 1H), 1.94 (t,  $J = 2.6$  Hz, 1H), 1.87 – 1.76 (m, 2H), 1.01 (d,  $J = 6.2$  Hz, 6H), 0.16 (s, 9H).  $^{13}C$  NMR (100 MHz,  $CDCl_3$ )  $\delta$  150.2, 124.2, 84.3, 77.8, 69.3, 41.4, 32.1, 32.0, 25.5, 23.6, 23.6, 21.0, 0.7. IR (KBr,  $cm^{-1}$ ): 2956, 1249, 1102, 841, 929, 634. HRMS (ESI,  $m/z$ ) calc for  $C_{15}H_{26}OSi$   $[M+Na]^+$ : 273.1645, found: 273.1642.



**((2-(Cyclohex-1-en-1-yl)-2-methylhex-5-yn-3-yl)oxy)trimethylsilane (1r).** 0.56 g (2.12 mmol) of **1r** was prepared from 0.46 g (2.40 mmol) of alcohol **S16** (88% yield).  $^1\text{H}$  NMR (400 MHz,  $\text{CDCl}_3$ )  $\delta$  5.52 – 5.46 (m, 1H), 3.80 (dd,  $J = 8.9, 2.3$  Hz, 1H), 2.30 (dt,  $J = 17.0, 2.5$  Hz, 1H), 2.12 – 1.98 (m, 4H), 1.96 – 1.83 (m, 2H), 1.64 – 1.48 (m, 4H), 0.98 (s, 3H), 0.94 (s, 3H), 0.16 (s, 9H).  $^{13}\text{C}$  NMR (100 MHz,  $\text{CDCl}_3$ )  $\delta$  142.1, 121.3, 84.5, 77.4, 77.0, 77.0, 69.2, 43.8, 25.6, 25.4, 25.0, 23.4, 23.4, 22.4, 20.0, 0.8. IR (KBr,  $\text{cm}^{-1}$ ): 2929, 1249, 1103, 840, 633. HRMS (ESI,  $m/z$ ) calc for  $\text{C}_{16}\text{H}_{28}\text{OSi}$   $[\text{M}+\text{Na}]^+$ : 287.1802, found: 287.1800.



**((1-(Cyclopent-1-en-1-yl)-2,2-dimethylhex-5-yn-3-yl)oxy)trimethylsilane (1n).** 0.39 g (1.48 mmol) of **1n** was prepared from 0.38 g (1.98 mmol) of alcohol **S17** (75% yield).  $^1\text{H}$  NMR (500 MHz,  $\text{CDCl}_3$ )  $\delta$  5.38 – 5.34 (m, 1H), 3.56 (dd,  $J = 8.5, 2.9$  Hz, 1H), 2.48 – 2.43 (m, 1H), 2.31 – 2.24 (m, 4H), 2.22 – 2.16 (m, 1H), 2.08 – 1.99 (m, 2H), 1.96 (t,  $J = 2.7$  Hz, 1H), 1.87 – 1.80 (m, 2H), 0.85 (s, 3H), 0.83 (s, 3H), 0.16 (s, 9H).  $^{13}\text{C}$  NMR (125 MHz,  $\text{CDCl}_3$ )  $\delta$  141.7, 127.9, 84.0, 79.5, 69.5, 39.6, 38.9, 37.8, 32.4, 24.1, 23.7, 23.3, 22.9, 0.7. IR (KBr,  $\text{cm}^{-1}$ ): 2956, 1249, 1096, 841, 635. HRMS (ESI,  $m/z$ ) calc for  $\text{C}_{16}\text{H}_{28}\text{OSi}$   $[\text{M}+\text{Na}]^+$ : 287.1802, found: 287.1799.



**((2-(1H-Inden-2-yl)-2-methylhex-5-yn-3-yl)oxy)trimethylsilane (1i).** 0.74 g (2.49 mmol) of **1i** was prepared from 0.60 g (2.66 mmol) of alcohol **S19** (94% yield).  $^1\text{H}$  NMR (500 MHz,  $\text{CDCl}_3$ )  $\delta$  7.42 (d,  $J = 7.4$  Hz, 1H), 7.32 (d,  $J = 7.4$  Hz, 1H), 7.27 – 7.23 (m, 1H), 7.17 – 7.12 (m, 1H), 6.63 – 6.58 (m, 1H), 3.88 (dt,  $J = 11.2, 5.6$  Hz, 1H), 3.50 (d,  $J = 22.6$  Hz, 1H), 3.36 (d,  $J = 22.6$  Hz, 1H), 2.35 (dt,  $J = 17.1, 2.8$  Hz, 1H), 2.13 (ddd,  $J = 17.1, 8.5, 2.7$  Hz, 1H), 1.93 (t,  $J = 2.7$  Hz, 1H), 1.24 (d,  $J = 3.9$  Hz,

6H), 0.21 (s, 9H).  $^{13}\text{C}$  NMR (125 MHz,  $\text{CDCl}_3$ )  $\delta$  155.5, 144.8, 143.3, 126.7, 126.2, 123.9, 123.4, 120.3, 83.7, 79.1, 69.7, 42.1, 39.0, 26.5, 23.8, 22.9, 0.7. IR (KBr,  $\text{cm}^{-1}$ ): 2961, 1249, 1102, 928, 841, 751, 717, 635. HRMS (ESI,  $m/z$ ) calc for  $\text{C}_{19}\text{H}_{26}\text{OSi}$   $[\text{M}+\text{Na}]^+$ : 321.1645, found: 321.1643.



**((2-(1*H*-Inden-3-yl)-2-methylhex-5-yn-3-yl)oxy)trimethylsilane (1k).** 0.81 g (2.72 mmol) of **1k** was prepared from 0.62 g (2.74 mmol) of alcohol **S20** (99% yield).  $^1\text{H}$  NMR (500 MHz,  $\text{CDCl}_3$ )  $\delta$  7.61 (d,  $J = 7.8$  Hz, 1H), 7.47 (d,  $J = 7.2$  Hz, 1H), 7.31 – 7.27 (m, 1H), 7.20 (td,  $J = 7.4, 0.8$  Hz, 1H), 6.28 (t,  $J = 2.1$  Hz, 1H), 4.46 (dd,  $J = 8.7, 3.0$  Hz, 1H), 3.30 (d,  $J = 2.0$  Hz, 2H), 2.28 (dt,  $J = 16.9, 2.9$  Hz, 1H), 2.21 (ddd,  $J = 16.9, 8.7, 2.7$  Hz, 1H), 1.89 (t,  $J = 2.7$  Hz, 1H), 1.37 (s, 3H), 1.31 (d,  $J = 3.7$  Hz, 3H), 0.15 (s, 9H).  $^{13}\text{C}$  NMR (125 MHz,  $\text{CDCl}_3$ )  $\delta$  150.5, 145.6, 143.5, 129.2, 125.7, 124.2, 124.1, 122.2, 83.9, 76.1, 69.5, 42.2, 37.3, 24.6, 23.6, 21.7, 0.7. IR (KBr,  $\text{cm}^{-1}$ ): 2956, 1249, 1104, 928, 841, 755, 722, 632. HRMS (ESI,  $m/z$ ) calc for  $\text{C}_{19}\text{H}_{26}\text{OSi}$   $[\text{M}+\text{Na}]^+$ : 321.1645, found: 321.1638.



**((2-(7-Methoxy-1*H*-inden-3-yl)-2-methylhex-5-yn-3-yl)oxy)trimethylsilane (1l).** 0.50 g (1.52 mmol) of **1l** was prepared from 0.46 g (1.74 mmol) of alcohol **S21** (87% yield).  $^1\text{H}$  NMR (400 MHz,  $\text{CDCl}_3$ )  $\delta$  7.31 – 7.22 (m, 2H), 6.76 (d,  $J = 7.5$  Hz, 1H), 6.30 – 6.25 (m, 1H), 4.46 (dd,  $J = 8.5, 3.1$  Hz, 1H), 3.90 (s, 3H), 3.26 (d,  $J = 1.8$  Hz, 2H), 2.32 – 2.15 (m, 2H), 1.89 (t,  $J = 2.6$  Hz, 1H), 1.36 (s, 3H), 1.30 (s, 3H), 0.15 (s, 9H).  $^{13}\text{C}$  NMR (100 MHz,  $\text{CDCl}_3$ )  $\delta$  155.4, 150.4, 145.4, 132.7, 129.3, 127.3, 115.5, 106.7, 83.9, 76.2, 69.5, 55.2, 42.2, 34.6, 24.8, 23.6, 21.7, 0.7. IR (KBr,  $\text{cm}^{-1}$ ): 2956,

1477, 1257, 1102, 927, 842, 773, 722, 634. HRMS (ESI, m/z) calc for C<sub>20</sub>H<sub>28</sub>O<sub>2</sub>Si [M+Na]<sup>+</sup>: 351.1751, found: 351.1747.

### 2.3) Procedures for the preparation of enynes-1o,1p,1j,1q



To a suspension of NaH (0.11 g, 2.64 mmol, 60% dispersion in mineral oil) in DMF (5 mL) at 0 °C was added dropwise a solution of diethyl 2-(prop-2-yn-1-yl)malonate (0.5 g, 2.52 mmol) in DMF (5 mL). The reaction mixture was stirred for 1 h. A solution of 1-(2-iodoethyl)cyclopent-1-ene (0.67 g, 3.03 mmol) in DMF (5 mL) was added dropwise, and then the reaction mixture was heated to 80 °C for 2 h. After being cooled to rt, the reaction was quenched with saturated NH<sub>4</sub>Cl solution (5 mL) and extracted with Et<sub>2</sub>O. The combined organic layers were washed with brine, dried over MgSO<sub>4</sub> and concentrated *in vacuo*. Purification of the residue by flash chromatography (PE/EtOAc = 100:1) afforded **1o** (0.58 g, 82%) as a colorless oil.

**Diethyl 2-(2-(cyclopent-1-en-1-yl)ethyl)-2-(prop-2-yn-1-yl)malonate (1o).** <sup>1</sup>H NMR (400 MHz, CDCl<sub>3</sub>) δ 5.39 – 5.35 (m, 1H), 4.22 – 4.15 (m, 4H), 2.82 (d, *J* = 2.7 Hz, 2H), 2.30 – 2.17 (m, 6H), 1.99 – 1.92 (m, 3H), 1.87 – 1.78 (m, 2H), 1.24 (t, *J* = 7.1 Hz, 6H). <sup>13</sup>C NMR (100 MHz, CDCl<sub>3</sub>) δ 170.1, 143.2, 123.9, 78.9, 71.2, 61.5, 56.6, 35.1, 32.4, 30.0, 25.5, 23.3, 22.6, 14.0. IR (KBr, cm<sup>-1</sup>): 2936, 1733, 1195, 1022, 643. HRMS (ESI, m/z) calc for C<sub>17</sub>H<sub>24</sub>O<sub>4</sub> [M+Na]<sup>+</sup>: 315.1567, found: 315.1568.



To a solution of 1-bromo-2-[(trimethylsilyl)ethynyl]benzene (1.10 g, 4.34 mmol) in THF (30 mL) was dropped *n*-BuLi (1.74 mL, 2.5 M in hexane) at -78 °C. The mixture was stirred for 1 h before the addition of aldehyde **S6** (0.5 g, 3.62 mmol) in THF (10 mL). The resulting mixture was stirred for another 2 h at this temperature before being quenched with saturated NH<sub>4</sub>Cl solution and extracted with Et<sub>2</sub>O. And the combined organic layers were washed with brine, dried with MgSO<sub>4</sub> and concentrated *in vacuo* to give the crude enyne.

To a stirred solution of the crude enyne in THF (15 mL) was added TBAF (5.4 mL, 1.0 M in THF), and the resulting mixture was stirred at rt for 0.5 h. The reaction was quenched with H<sub>2</sub>O and extracted with Et<sub>2</sub>O. The combined organic layers were washed with brine, dried over MgSO<sub>4</sub> and concentrated *in vacuo*. Purification of the residue by flash chromatography (PE/EtOAc = 20:1) afforded alcohol (0.69 g, 80%) as a colorless oil.

To a stirred solution of the alcohol (0.25 g, 1.04 mmol) in CH<sub>2</sub>Cl<sub>2</sub> (20 mL) at 0 °C was added DMAP (13 mg, 0.036 mmol), imidazole (0.176 g, 2.59 mmol), and TMSCl (0.26 mL, 2.07 mmol) in sequence. After being stirred for 0.5 h, the reaction mixture was poured into H<sub>2</sub>O and extracted with CH<sub>2</sub>Cl<sub>2</sub>. The combined organic layers were washed with brine, dried over MgSO<sub>4</sub> and concentrated *in vacuo*. Purification of the residue by flash chromatography (PE/EtOAc = 100:1) afforded **1p** (0.31 g, 95%) as a colorless oil. **(2-(Cyclopent-1-en-1-yl)-1-(2-ethynylphenyl)-2-methylpropoxy)trimethylsilane (1p)**. <sup>1</sup>H NMR (500 MHz, CDCl<sub>3</sub>) δ 7.44 – 7.39 (m, 2H), 7.30 – 7.26 (m, 1H), 7.17 (td,

$J = 7.5, 1.3$  Hz, 1H), 5.28 – 5.25 (m, 1H), 5.16 (s, 1H), 3.27 (s, 1H), 2.42 – 2.33 (m, 2H), 2.32 – 2.20 (m, 2H), 1.90 – 1.75 (m, 2H), 1.07 (s, 3H), 1.02 (s, 3H), -0.08 (s, 9H).  $^{13}\text{C}$  NMR (125 MHz,  $\text{CDCl}_3$ )  $\delta$  150.0, 145.4, 132.0, 128.6, 127.8, 126.5, 124.9, 121.1, 82.8, 81.0, 77.3, 42.3, 33.1, 32.4, 24.3, 23.6, 22.5, -0.2. IR (KBr,  $\text{cm}^{-1}$ ): 2955, 1382, 1251, 1067, 885, 760, 607. HRMS (ESI,  $m/z$ ) calc for  $\text{C}_{20}\text{H}_{28}\text{OSi}$   $[\text{M}+\text{Na}]^+$ : 335.1802, found: 335.1796.



To a solution of **1H-indene** (1.1 equiv) in THF (0.1 M) at  $-78^\circ\text{C}$  was added  $n\text{-BuLi}$  (1.2 equiv, 2.5 M in hexane) dropwise. The reaction mixture was stirred for 1 h before the addition of  $\text{BF}_3 \cdot \text{OEt}_2$  (1.0 equiv). The mixture was stirred for 0.5 h before the addition of epoxide (1.0 equiv) in THF and then stirred for another 2 h. The reaction was quenched with saturated  $\text{NH}_4\text{Cl}$  solution and extracted with  $\text{Et}_2\text{O}$ . The combined organic layers were washed with brine, dried with  $\text{MgSO}_4$  and concentrated *in vacuo* to give the crude enyne.

To a stirred solution of crude enyne in THF (0.3 M) was added TBAF (1.5 equiv, 1.0 M in THF), and the resulting mixture was stirred at rt for 0.5 h.  $\text{H}_2\text{O}$  was added, and the mixture was extracted with  $\text{Et}_2\text{O}$ . The combined organic layers were washed with brine, dried over  $\text{MgSO}_4$  and concentrated *in vacuo*. Purification of the residue by flash chromatography (PE/ $\text{EtOAc} = 20:1$ ) afforded the alcohol **S19** or **S20**.

Alcohol **S19** or **S20** (1 equiv) was dissolved in CH<sub>2</sub>Cl<sub>2</sub> (0.1 M), and then treated with imidazole (2.5 equiv), DMAP (0.1 equiv) and TMSCl (2.0 equiv) at 0°C. After being stirred for 0.5 h, the reaction mixture was poured into H<sub>2</sub>O and extracted with CH<sub>2</sub>Cl<sub>2</sub>. The combined organic layers were dried over MgSO<sub>4</sub> and concentrated *in vacuo*. Purification of the residue by flash chromatography (PE/EtOAc = 100:1) afforded the **1j** or **1q** as a colorless oil.



**1-(1H-Inden-3-yl)pent-4-yn-2-ol (S19).** 0.48 g (2.44 mmol) of **S19** was prepared from 0.72 g (4.69 mmol) of the corresponding epoxide (52% yield). <sup>1</sup>H NMR (400 MHz, CDCl<sub>3</sub>) δ 7.48 (d, *J* = 7.3 Hz, 1H), 7.42 (d, *J* = 7.5 Hz, 1H), 7.32 (t, *J* = 7.4 Hz, 1H), 7.23 (t, *J* = 7.4 Hz, 1H), 6.39 (s, 1H), 4.22 – 4.09 (m, 1H), 3.39 (s, 2H), 2.98 – 2.89 (m, 1H), 2.82 (dd, *J* = 14.4, 7.6 Hz, 1H), 2.58 – 2.41 (m, 2H), 2.16 – 2.09 (m, 2H). <sup>13</sup>C NMR (100 MHz, CDCl<sub>3</sub>) δ 144.8, 144.4, 140.3, 131.0, 126.1, 124.8, 123.8, 119.1, 80.6, 71.0, 68.4, 38.0, 34.7, 26.8. IR (KBr, cm<sup>-1</sup>): 3293, 2916, 1460, 1077, 770, 722, 644. HRMS (ESI, *m/z*) calc for C<sub>14</sub>H<sub>14</sub>O [M+Na]<sup>+</sup>: 221.0937, found: 221.0935.



**1-(1H-Inden-3-yl)-3,3-dimethylhex-5-yn-2-ol (S20).** 0.28 g (1.17 mmol) of **S20** was prepared from 0.5 g (2.55 mmol) of the corresponding epoxide (46% yield). <sup>1</sup>H NMR (400 MHz, CDCl<sub>3</sub>) δ 7.49 (d, *J* = 7.3 Hz, 1H), 7.42 (d, *J* = 7.5 Hz, 1H), 7.32 (t, *J* = 7.4 Hz, 1H), 7.27 – 7.21 (m, 1H), 6.40 (s, 1H), 3.83 (dd, *J* = 8.7, 2.2 Hz, 1H), 3.39 (s, 2H), 2.94 – 2.84 (m, 1H), 2.61 – 2.52 (m, 1H), 2.44 – 2.24 (m, 2H), 2.03 (t, *J* = 2.7 Hz, 1H), 1.79 (d, *J* = 3.1 Hz, 1H), 1.15 (s, 3H), 1.12 (s, 3H). <sup>13</sup>C NMR (100 MHz, CDCl<sub>3</sub>) δ

144.8, 144.5, 141.6, 130.8, 126.1, 124.8, 123.9, 119.1, 82.3, 74.5, 70.2, 37.9, 37.5, 30.4, 29.1, 23.5, 22.0. IR (KBr,  $\text{cm}^{-1}$ ): 3300, 2963, 1427, 1056, 770, 722, 632. HRMS (ESI,  $m/z$ ) calc for  $\text{C}_{17}\text{H}_{20}\text{O}$   $[\text{M}+\text{Na}]^+$ : 263.1406, found: 263.1403.



**((1-(1*H*-Inden-3-yl)pent-4-yn-2-yl)oxy)trimethylsilane (1j).** 0.55 g (2.04 mmol) of **1j** was prepared from 0.46 g (2.34 mmol) of **S19** (87% yield).  $^1\text{H}$  NMR (400 MHz,  $\text{CDCl}_3$ )  $\delta$  7.47 (d,  $J = 7.3$  Hz, 1H), 7.42 (d,  $J = 7.5$  Hz, 1H), 7.31 (t,  $J = 7.4$  Hz, 1H), 7.21 (t,  $J = 7.4$  Hz, 1H), 6.33 (s, 1H), 4.18 – 4.10 (m, 1H), 3.35 (s, 2H), 3.01 – 2.94 (m, 1H), 2.76 (dd,  $J = 14.0, 7.2$  Hz, 1H), 2.50 – 2.33 (m, 2H), 2.10 – 2.05 (m, 1H), 0.02 (s, 9H).  $^{13}\text{C}$  NMR (100 MHz,  $\text{CDCl}_3$ )  $\delta$  145.4, 144.2, 140.9, 131.0, 125.9, 124.50 123.7, 119.3, 81.6, 70.3, 70.2, 37.8, 35.3, 27.6, 0.0. IR (KBr,  $\text{cm}^{-1}$ ): 2954, 1251, 1098, 842, 758, 639. HRMS (ESI,  $m/z$ ) calc for  $\text{C}_{17}\text{H}_{22}\text{Si}$   $[\text{M}+\text{Na}]^+$ : 293.1332, found: 293.1334.



**((1-(1*H*-Inden-3-yl)-3,3-dimethylhex-5-yn-2-yl)oxy)trimethylsilane (1q).** 0.29 g (0.93 mmol) of **1q** was prepared from 0.26 g (1.10 mmol) of **S20** (85% yield).  $^1\text{H}$  NMR (400 MHz,  $\text{CDCl}_3$ )  $\delta$  7.47 (d,  $J = 7.3$  Hz, 1H), 7.40 (d,  $J = 7.5$  Hz, 1H), 7.33 – 7.27 (m, 1H), 7.21 (td,  $J = 7.4, 1.0$  Hz, 1H), 6.31 – 5.27 (m, 1H), 4.01 (dd,  $J = 9.9, 2.2$  Hz, 1H), 3.34 (s, 2H), 2.85 – 2.78 (m, 1H), 2.59 (dd,  $J = 13.9, 9.9$  Hz, 1H), 2.33 – 2.19 (m, 2H), 2.05 (t,  $J = 2.7$  Hz, 1H), 1.11 (d,  $J = 6.0$  Hz, 3H), 1.09 (s, 3H), -0.20 (s, 9H).  $^{13}\text{C}$  NMR (100 MHz,  $\text{CDCl}_3$ )  $\delta$  145.4, 144.3, 142.1, 131.0, 125.9, 124.4, 123.8, 119.2, 82.7, 77.1, 70.3, 38.6, 37.6, 31.2, 29.2, 23.7, 22.6, 0.4. IR (KBr,  $\text{cm}^{-1}$ ): 2960, 1249, 1092, 839, 771, 719, 634. HRMS (ESI,  $m/z$ ) calc for  $\text{C}_{20}\text{H}_{28}\text{OSi}$   $[\text{M}+\text{Na}]^+$ : 335.1802, found: 335.1798.

### 3. Optimization of EYM Conditions

3.1) Table S1. Optimization of EYM Reaction Conditions<sup>a</sup>.



| Entry          | Catalyst [mol %]      | Solvent                             | T(°C)         | t [h]    | Yield [%] <sup>[b]</sup> (2a:3) |
|----------------|-----------------------|-------------------------------------|---------------|----------|---------------------------------|
| 1 <sup>e</sup> | PtCl <sub>2</sub> (5) | Toluene                             | 80            | 1        | 66 (1:2.4) <sup>c</sup>         |
| 2 <sup>d</sup> | A (5)                 | DCE                                 | reflux        | 1.5      | 86 (1:1.2) <sup>c</sup>         |
| 3              | B (5)                 | CH <sub>2</sub> Cl <sub>2</sub>     | reflux        | 4        | 30 (2a) <sup>f</sup>            |
| 4              | C (5)                 | CH <sub>2</sub> Cl <sub>2</sub>     | reflux        | 24       | 30 (2a) <sup>g</sup>            |
| 5              | E (5)                 | CH <sub>2</sub> Cl <sub>2</sub>     | reflux        | 1        | 81 (2a)                         |
| 6              | D (5)                 | CH <sub>2</sub> Cl <sub>2</sub>     | reflux        | 1        | 93 (2a)                         |
| 7              | D (5)                 | Toluene                             | 80            | 1        | 79 (2a)                         |
| 8              | <b>D (3)</b>          | <b>CH<sub>2</sub>Cl<sub>2</sub></b> | <b>reflux</b> | <b>1</b> | <b>90 (2a, 87°)</b>             |
| 9 <sup>e</sup> | D (5)                 | CH <sub>2</sub> Cl <sub>2</sub>     | reflux        | 12       | 88 (2a)                         |

**Catalysts:**



<sup>a</sup>Reactions were performed with 0.5 mmol of **1a**, 3–5 mol% of catalyst under ethylene in specified solvent (0.03 M) unless otherwise stated. <sup>b</sup> NMR yield with anthracene as an internal standard. <sup>c</sup>Isolated yield, the ratio was determined by <sup>1</sup>H NMR. <sup>d</sup>5 mol% A, 5 mol% P(OPh)<sub>3</sub>, DMAD (1.0 equiv), DCE, 80 °C, 1.5 h. <sup>e</sup>Reaction was run under argon atmosphere. <sup>f</sup>With a 40% yield of recycling starting material **1a**. <sup>g</sup>With a 10% yield of recycling starting material **1a**

### 3.2) Proposed mechanism of the formation of byproduct 3



**Scheme S1.** Proposed mechanism of the formation of byproduct 3

### 3.3) Typical procedure for EYM reaction

**Method I:** To a solution of enyne (1.0 equiv) in CH<sub>2</sub>Cl<sub>2</sub> (0.03 M) was added G-II (3 mol%), and the solution was refluxed under an atmosphere of ethylene for 4 h. Then the solvent was removed *in vacuo*. Purification of the residue by flash chromatography afforded the corresponding diene.

**Method II:** To a solution of enyne (1.0 equiv) in CH<sub>2</sub>Cl<sub>2</sub> (0.03 M) was added G-II (3 mol%), and the solution was refluxed under an atmosphere of ethylene for 4 h. After the solvent was removed, the residue was redissolved in THF (0.5 M), and then treated with TBAF (1.5 equiv, 1 M in THF). After 0.5 h, water was added, and the mixture was extracted with Et<sub>2</sub>O. The combined organic layers were washed with brine, dried over MgSO<sub>4</sub> concentrated *in vacuo*. Purification of the residue by flash chromatography afforded the corresponding diene.

**Method III:** To a solution of enyne (1.0 equiv) in CH<sub>2</sub>Cl<sub>2</sub> (0.03 M) was added G-II (3 mol%), and the solution was refluxed under an atmosphere of ethylene for 4 h. Then the second portion of G-II (3 mol%) was added again, and then the reaction was run for another 12h. Then the solvent was removed *in vacuo*. Purification of the residue by flash chromatography afforded the corresponding diene.

**Method IV:** To a solution of enyne (1.0 equiv) in CH<sub>2</sub>Cl<sub>2</sub> (0.005 M) was added G-II (5 mol%), and the solution was refluxed under an atmosphere of ethylene for 12 h. After the solvent was removed, the residue was redissolved in THF (0.5 M), and then treated with TBAF (1.5 equiv, 1 M in THF). After stirred for 0.5 h, the mixture was quenched with H<sub>2</sub>O and extracted with Et<sub>2</sub>O. The combined organic layers were washed with brine, dried over MgSO<sub>4</sub> and concentrated *in vacuo*. Purification of the residue by flash chromatography afforded the corresponding diene.

## 4. Characterization of Bicyclic Dienes 2a-2r



### **((3,3-Dimethyl-1,2,3,4,5,6-hexahydroazulen-2-yl)oxy)trimethylsilane (2a).**

Following the typical procedure method I, diene **2a** (0.81 g, 3.23 mmol) was obtained from enyne **1a** (0.93 g, 3.69 mmol) as a colorless oil in 87% yield.  $^1\text{H}$  NMR (400 MHz,  $\text{CDCl}_3$ )  $\delta$  5.75 – 5.63 (m, 2H), 3.86 (t,  $J = 7.3$  Hz, 1H), 2.44 – 2.20 (m, 6H), 1.90 – 1.70 (m, 2H), 0.96 (s, 3H), 0.88 (s, 3H), 0.12 (s, 9H).  $^{13}\text{C}$  NMR (100 MHz,  $\text{CDCl}_3$ )  $\delta$  147.0, 132.0, 127.1, 125.3, 79.5, 50.3, 43.3, 31.4, 28.5, 24.7, 24.6, 18.9, 0.2. IR (KBr,  $\text{cm}^{-1}$ ): 2956, 1250, 1090, 898, 840, 748. HRMS (ESI,  $m/z$ ) calc for  $\text{C}_{15}\text{H}_{26}\text{OSi}$   $[\text{M}+\text{Na}]^+$ : 273.1645, found: 273.1644.



### **Ethyl 1,2,3,6,7,8-hexahydroazulene-1-carboxylate (2b).**

Following the typical procedure method I, diene **2b** (2.01 g, 9.95 mmol) was obtained from enyne **1b** (3.0 g, 14.85 mmol) as a colorless oil in 67% yield.  $^1\text{H}$  NMR (500 MHz,  $\text{CDCl}_3$ )  $\delta$  5.82 – 5.71 (m, 2H), 4.18 – 4.11 (m, 2H), 3.46 (t,  $J = 6.9$  Hz, 1H), 2.65 – 2.56 (m, 1H), 2.45 – 2.28 (m, 5H), 2.10 – 2.04 (m, 2H), 1.90 – 1.72 (m, 2H), 1.28 – 1.22 (m, 3H).  $^{13}\text{C}$  NMR (125 MHz,  $\text{CDCl}_3$ )  $\delta$  175.1, 137.6, 135.4, 133.3, 124.3, 60.3, 56.7, 37.5, 31.1, 30.9, 26.9, 24.2, 14.3. IR (KBr,  $\text{cm}^{-1}$ ): 2935, 1728, 1182, 1038, 840. HRMS (ESI,  $m/z$ ) calc for  $\text{C}_{13}\text{H}_{18}\text{O}_2$   $[\text{M}+\text{Na}]^+$ : 229.1199, found: 229.1196.



### **N-Methoxy-N-methyl-1,2,3,6,7,8-hexahydroazulene-1-carboxamide (2c).**

Following the typical procedure method I, diene **2c** (1.20 g, 5.43 mmol) was obtained from enyne **1c** (1.54 g, 6.97 mmol) as a colorless oil in 78% yield. <sup>1</sup>H NMR (400 MHz, CDCl<sub>3</sub>) δ 5.79 – 5.68 (m, 2H), 3.99 (s, 1H), 3.67 (s, 3H), 3.19 (s, 3H), 2.63 – 2.52 (m, 1H), 2.50 – 2.40 (m, 1H), 2.35 – 2.24 (m, 3H), 2.23 – 2.03 (m, 2H), 2.00 – 1.91 (m, 1H), 1.87 – 1.70 (m, 2H). <sup>13</sup>C NMR (100 MHz, CDCl<sub>3</sub>) δ 176.5, 138.5, 135.4, 132.8, 124.5, 61.3, 52.7, 37.7, 32.4, 31.0, 27.4, 24.3. IR (KBr, cm<sup>-1</sup>): 2936, 1657, 1384, 1177, 992, 842, 733. HRMS (ESI, m/z) calc for C<sub>13</sub>H<sub>19</sub>NO<sub>2</sub> [M+Na]<sup>+</sup>: 244.1308, found: 244.1304.



**tert-Butyl ((1,2,3,6,7,8-hexahydroazulen-1-yl)methyl)(tosyl)carbamate (2d).**

Following the typical procedure method I, diene **2d** (0.11 g, 0.26 mmol) was obtained from enyne **1d** (0.18 g, 0.43 mmol) as a colorless oil in 60% yield. <sup>1</sup>H NMR (500 MHz, CDCl<sub>3</sub>) δ 7.79 – 7.75 (d, *J* = 8.3 Hz, 2H), 7.31 – 7.27 (d, *J* = 8.3 Hz, 2H), 5.80 – 5.72 (m, 2H), 3.91 – 3.86 (dd, *J* = 14.0, 4.1 Hz, 1H), 3.82 – 3.76 (dd, *J* = 14.0, 10.1 Hz, 1H), 3.12 – 3.04 (m, 1H), 2.61 – 2.49 (m, 1H), 2.43 (s, 3H), 2.42 – 2.37 (m, 2H), 2.37 – 2.27 (m, 3H), 1.99 – 1.90 (m, 1H), 1.89 – 1.76 (m, 3H), 1.32 (s, 9H). <sup>13</sup>C NMR (125 MHz, CDCl<sub>3</sub>) δ 151.3, 144.0, 140.8, 137.7, 134.1, 132.6, 127.9, 124.8, 84.1, 51.9, 49.4, 36.2, 31.3, 30.9, 27.0, 24.4, 21.6. IR (KBr, cm<sup>-1</sup>): 2978, 2933, 1727, 1354, 1154, 674, 545. HRMS (ESI, m/z) calc for C<sub>23</sub>H<sub>31</sub>NO<sub>4</sub>S [M+Na]<sup>+</sup>: 440.1866, found: 440.1867.



**3-((Methoxymethoxy)methyl)-1,2,3,4,5,6-hexahydroazulene (2e).**

Following the typical procedure method I, diene **2e** (0.255 g, 1.23 mmol) was obtained from enyne **1e** (0.416 g, 2.0 mmol) as a colorless oil in 62% yield. <sup>1</sup>H NMR (400 MHz, CDCl<sub>3</sub>) δ 5.77 – 5.69 (m, 2H), 4.65 – 4.60 (m, 2H), 3.59 (dd, *J* = 9.4, 4.5 Hz, 1H), 3.43

(dd,  $J = 9.4, 7.4$  Hz, 1H), 3.36 (s, 3H), 2.84 (brs, 1H), 2.46 – 2.28 (m, 6H), 2.04 – 1.93 (m, 1H), 1.86 – 1.67 (m, 3H).  $^{13}\text{C}$  NMR (100 MHz,  $\text{CDCl}_3$ )  $\delta$  140.7, 133.7, 132.2, 125.0, 96.6, 70.2, 55.1, 51.5, 36.6, 31.1, 30.8, 26.7, 24.4. IR (KBr,  $\text{cm}^{-1}$ ): 3360, 2925, 1439, 1044, 811. HRMS (ESI,  $m/z$ ) calc for  $\text{C}_{13}\text{H}_{20}\text{O}_2$   $[\text{M}+\text{Na}]^+$ : 231.1356, found: 231.1355.



**(1,2,3,6,7,8-Hexahydroazulen-1-yl)methyl acetate (2f).**

Following the typical procedure method I, diene **2f** (0.14 g, 0.68 mmol) was obtained from enyne **1f** (0.21 g, 1.02 mmol) as a colorless oil in 66% yield.  $^1\text{H}$  NMR (400 MHz,  $\text{CDCl}_3$ )  $\delta$  5.78 – 5.68 (m, 2H), 4.12 (dd,  $J = 10.8, 4.7$  Hz, 1H), 3.97 (dd,  $J = 10.8, 7.4$  Hz, 1H), 2.86 (brs, 1H), 2.51 – 2.25 (m, 6H), 2.05 – 1.92 (m, 4H), 1.96 – 1.73 (m, 2H), 1.67 – 1.57 (m, 1H).  $^{13}\text{C}$  NMR (100 MHz,  $\text{CDCl}_3$ )  $\delta$  171.2, 139.7, 134.2, 132.7, 124.6, 66.5, 50.4, 36.5, 31.1, 30.7, 26.6, 24.3, 20.9. IR (KBr,  $\text{cm}^{-1}$ ): 2937, 1739, 1365, 1236, 1034, 802. HRMS (ESI,  $m/z$ ) calc for  $\text{C}_{13}\text{H}_{18}\text{O}_2$   $[\text{M}+\text{Na}]^+$ : 229.1199, found: 229.1197.



**tert-Butyl((1,2,3,6,7,8-hexahydroazulen-1-yl)methoxy)diphenylsilane (2g).**

Following the typical procedure method I, diene **2g** (1.454 g, 3.61 mmol) was obtained from enyne **1g** (0.90 g, 2.24 mmol) as a colorless oil in 62% yield.  $^1\text{H}$  NMR (400 MHz,  $\text{CDCl}_3$ )  $\delta$  7.72 – 7.70 (m, 4H), 7.45 – 7.40 (m, 6H), 5.81 – 5.72 (m, 2H), 3.76 (dd,  $J = 9.9, 4.7$  Hz, 1H), 3.61 (dd,  $J = 9.9, 6.6$  Hz, 1H), 2.82 (brs, 1H), 2.55 – 2.45 (m, 1H), 2.40 – 2.24 (m, 5H), 2.04 – 1.94 (m, 1H), 1.88 – 1.75 (m, 3H), 1.09 (s, 9H).  $^{13}\text{C}$  NMR (100 MHz,  $\text{CDCl}_3$ )  $\delta$  141.3, 135.6, 135.6, 135.5, 134.1, 134.0, 133.6, 132.0, 129.5, 127.5, 125.1, 66.2, 53.9, 36.8, 31.1, 31.0, 26.8, 26.4, 24.5, 19.3. IR (KBr,  $\text{cm}^{-1}$ ): 2930, 1427, 1111, 822, 739, 702, 612, 504. HRMS (ESI,  $m/z$ ) calc for  $\text{C}_{27}\text{H}_{34}\text{OSi}$   $[\text{M}+\text{Na}]^+$ :

455.2271, found: 455.2277



***tert*-Butyl((1,2,3,6,7,8-hexahydroazulen-1-yl)methoxy)dimethylsilane (2h).**

Following the typical procedure method I, diene **2h** (2.30 g, 8.26 mmol) was obtained from enyne **1h** (3.12 g, 11.2 mmol) as a colorless oil in 74% yield. <sup>1</sup>H NMR (500 MHz, CDCl<sub>3</sub>) δ 5.75 – 5.69 (m, 2H), 3.67 (dd, *J* = 9.8, 4.9 Hz, 1H), 3.47 (dd, *J* = 9.8, 7.2 Hz, 1H), 2.77 – 2.71 (m, 1H), 2.47 – 2.28 (m, 6H), 1.97 – 1.88 (m, 1H), 1.87 – 1.75 (m, 2H), 1.66 (ddd, *J* = 13.5, 9.4, 4.8 Hz, 1H), 0.89 (s, 9H), 0.04 (s, 6H). <sup>13</sup>C NMR (125 MHz, CDCl<sub>3</sub>) δ 141.5, 133.4, 132.0, 125.1, 65.6, 54.0, 36.6, 31.2, 31.1, 26.4, 25.9, 24.6, 18.3, -5.3, -5.3. IR (KBr, cm<sup>-1</sup>): 2929, 1471, 1255, 1101, 836, 776. HRMS (ESI, *m/z*) calc for C<sub>17</sub>H<sub>30</sub>OSi [M+Na]<sup>+</sup>: 301.1958, found: 301.1958.



**3,3-Dimethyl-1,2,3,4-tetrahydrobenzo[*f*]azulen-2-ol (2i).**

Following the typical procedure method II, diene **2i** (0.15 g, 0.67 mmol) was obtained from enyne **1i** (0.30 g, 1.0 mmol) as a white solid in 67% yield. M.P. 77 – 79 °C. <sup>1</sup>H NMR (400 MHz, CDCl<sub>3</sub>) δ 7.33 – 7.27 (m, 2H), 7.23 – 7.18 (m, 1H), 7.14 (d, *J* = 7.5 Hz, 1H), 6.94 (d, *J* = 11.4 Hz, 1H), 6.36 (d, *J* = 11.4 Hz, 1H), 3.96 (t, *J* = 7.4 Hz, 1H), 3.12 (d, *J* = 13.7 Hz, 1H), 2.99 (d, *J* = 13.7 Hz, 1H), 2.51 (dd, *J* = 14.6, 7.3 Hz, 1H), 2.36 (dd, *J* = 14.6, 7.5 Hz, 1H), 1.12 (s, 3H), 1.00 (s, 3H), 0.11 (s, 9H). <sup>13</sup>C NMR (100 MHz, CDCl<sub>3</sub>) δ 145.2, 136.4, 136.1, 131.5, 128.6, 128.6, 128.2, 127.7, 127.4, 125.3, 80.4, 49.6, 40.3, 32.4, 25.2, 19.6, 0.1. IR (KBr, cm<sup>-1</sup>): 3375, 2953, 1461, 1060, 788, 738. HRMS (ESI, *m/z*) calc for C<sub>16</sub>H<sub>18</sub>O [M+Na]<sup>+</sup>: 249.1250, found: 249.1245.



**1,2,3,6-Tetrahydrobenzo[e]azulen-2-ol (2j).**

Following the typical procedure method II, diene **2j** (0.18 g, 0.91 mmol) was obtained from enyne **1j** (0.27 g, 1.0 mmol) as a colorless oil in 91% yield.  $^1\text{H}$  NMR (500 MHz,  $\text{CDCl}_3$ )  $\delta$  7.38 – 7.32 (m, 2H), 7.29 – 7.24 (m, 1H), 7.21 (d,  $J = 7.6$  Hz, 1H), 6.09 (d,  $J = 9.7$  Hz, 1H), 5.76 (dt,  $J = 9.6, 6.8$  Hz, 1H), 4.67 – 4.59 (m, 1H), 3.42 – 3.30 (m, 1H), 3.12 – 2.97 (m, 4H), 2.74 (d,  $J = 17.4$  Hz, 1H), 2.08 (s, 1H).  $^{13}\text{C}$  NMR (125 MHz,  $\text{CDCl}_3$ )  $\delta$  137.6, 136.4, 135.7, 134.9, 128.5, 127.7, 125.7, 125.7, 125.5, 125.1, 70.3, 46.7, 45.5, 34.9. IR (KBr,  $\text{cm}^{-1}$ ): 3340, 2924, 1487, 1035, 822, 758, 729, 628. HRMS (ESI,  $m/z$ ) calc for  $\text{C}_{14}\text{H}_{14}\text{O}$   $[\text{M}+\text{Na}]^+$ : 221.0937, found: 221.0935.



**1,1-Dimethyl-1,2,3,6-tetrahydrobenzo[e]azulen-2-ol (2k).**

Following the typical procedure method II, diene **2k** (0.07 g, 0.31 mmol) was obtained from enyne **1k** (0.145 g, 0.49 mmol) as a colorless oil in 63% yield.  $^1\text{H}$  NMR (500 MHz,  $\text{CDCl}_3$ )  $\delta$  7.66 (dd,  $J = 7.9, 0.8$  Hz, 1H), 7.31 (td,  $J = 7.4, 1.3$  Hz, 1H), 7.26 – 7.22 (m, 1H), 7.21 (dd,  $J = 7.5, 1.0$  Hz, 1H), 6.02 (d,  $J = 9.6$  Hz, 1H), 5.80 (dt,  $J = 9.5, 6.7$  Hz, 1H), 3.98 (t,  $J = 6.1$  Hz, 1H), 3.05 – 2.84 (m, 3H), 2.61 (dd,  $J = 15.7, 5.9$  Hz, 1H), 1.83 (brs, 1H), 1.43 – 1.35 (m, 6H).  $^{13}\text{C}$  NMR (125 MHz,  $\text{CDCl}_3$ )  $\delta$  146.2, 138.5, 136.0, 134.0, 127.8, 127.7, 127.1, 125.8, 125.1, 125.1, 80.6, 41.5, 35.0, 29.6, 25.8, 20.0. IR (KBr,  $\text{cm}^{-1}$ ): 3390, 2927, 1461, 1081, 768, 728, 662. HRMS (ESI,  $m/z$ ) calc for  $\text{C}_{16}\text{H}_{18}\text{O}$   $[\text{M}+\text{Na}]^+$ : 249.1250, found: 249.1247.



**7-Methoxy-1,1-dimethyl-1,2,3,6-tetrahydrobenzo[e]azulen-2-ol (2l).**

Following the typical procedure method II, diene **2l** (0.18 g, 0.70 mmol) was obtained from enyne **1l** (0.33 g, 1.0 mmol) as a white solid in 70% yield. M.P. 119 – 121 °C. <sup>1</sup>H NMR (500 MHz, CDCl<sub>3</sub>) δ 7.29 (d, *J* = 7.7 Hz, 1H), 7.20 – 7.15 (m, 1H), 6.92 (d, *J* = 7.9 Hz, 1H), 6.05 (d, *J* = 9.4 Hz, 1H), 5.84 (dt, *J* = 9.4, 6.9 Hz, 1H), 4.00 – 3.95 (m, 1H), 3.86 (s, 3H), 2.86 (brs, 2H), 2.61 (dd, *J* = 15.6, 5.6 Hz, 1H), 1.83 (s, 1H), 1.46 – 1.31 (m, 7H). <sup>13</sup>C NMR (125 MHz, CDCl<sub>3</sub>) δ 155.2, 146.3, 136.4, 135.6, 127.5, 126.8, 126.3, 125.0, 117.6, 109.6, 80.7, 55.7, 41.6, 25.9, 25.2, 20.0. IR (KBr, cm<sup>-1</sup>): 3410, 2931, 1471, 1265, 1107, 790, 726, 643. HRMS (ESI, *m/z*) calc for C<sub>17</sub>H<sub>20</sub>O<sub>2</sub> [M+Na]<sup>+</sup>: 279.1356, found: 279.1356.



**((3,3-Dimethyl-2,3,4,5-tetrahydro-1H-inden-2-yl)oxy)trimethylsilane (2m).**

Following the typical procedure method I, diene **2m** (0.40 g, 1.69 mmol) was obtained from enyne **1m** (0.47 g, 2.00 mmol) as a colorless oil in 85% yield. <sup>1</sup>H NMR (500 MHz, CDCl<sub>3</sub>) δ 5.84 (dt, *J* = 9.5, 1.9 Hz, 1H), 5.68 – 5.63 (m, 1H), 3.95 (t, *J* = 7.0 Hz, 1H), 2.43 (ddt, *J* = 15.1, 7.1, 2.2 Hz, 1H), 2.25 – 2.18 (m, 3H), 2.09 – 2.02 (m, 2H), 0.98 (s, 3H), 0.89 (s, 3H), 0.12 (s, 9H). <sup>13</sup>C NMR (125 MHz, CDCl<sub>3</sub>) δ 142.1, 127.6, 124.7, 123.9, 80.6, 47.8, 39.8, 24.7, 23.4, 19.6, 19.0, 0.1. IR (KBr, cm<sup>-1</sup>): 2956, 1462, 1250, 1093, 840, 750. HRMS (ESI, *m/z*) calc for C<sub>14</sub>H<sub>24</sub>OSi [M+Na]<sup>+</sup>: 259.1489, found: 259.1485.



### 3,3-Dimethyl-2,3,4,5,6,7-hexahydro-1*H*-benzo[7]annulen-2-ol (**2n**).

Following the typical procedure method II, diene **2n** (0.105 g, 0.55 mmol) was obtained from enyne **1n** (0.264 g, 1.00 mmol) as a colorless oil in 55% yield. <sup>1</sup>H NMR (500 MHz, CDCl<sub>3</sub>) δ 5.77 – 5.71 (m, 1H), 5.57 (d, *J* = 11.9 Hz, 1H), 3.50 (t, *J* = 5.8 Hz, 1H), 2.41 – 2.32 (m, 1H), 2.23 (dd, *J* = 11.9, 5.9 Hz, 2H), 2.14 – 1.94 (m, 5H), 1.86 – 1.79 (m, 2H), 1.42 (brs, 1H), 0.92 (s, 3H), 0.90 (s, 3H). <sup>13</sup>C NMR (125 MHz, CDCl<sub>3</sub>) δ 135.7, 131.3, 130.1, 123.5, 74.1, 45.1, 37.3, 35.4, 33.7, 31.2, 28.0, 26.2, 21.8. IR (KBr, cm<sup>-1</sup>): 3404, 2924, 1448, 1043, 722. HRMS (ESI, *m/z*) calc for C<sub>13</sub>H<sub>20</sub>O [M+Na]<sup>+</sup>: 215.1406, found: 215.1405.



### Diethyl 1,3,4,7,8,9-hexahydro-2*H*-benzo[7]annulene-2,2-dicarboxylate (**2o**).

Following the typical procedure method I, diene **2o** (0.15 g, 0.54 mmol) was obtained from enyne **1o** (0.28 g, 1.00 mmol) as a colorless oil in 54% yield. <sup>1</sup>H NMR (500 MHz, CDCl<sub>3</sub>) δ 5.78 – 5.72 (m, 1H), 5.61 (d, *J* = 11.8 Hz, 1H), 4.19 – 4.14 (m, 4H), 2.55 (s, 2H), 2.24 – 2.15 (m, 4H), 2.11 – 2.05 (m, 4H), 1.85 – 1.78 (m, 2H), 1.23 (t, *J* = 7.1 Hz, 6H). <sup>13</sup>C NMR (125 MHz, CDCl<sub>3</sub>) δ 171.5, 135.6, 131.5, 130.0, 124.6, 61.1, 53.5, 35.9, 35.0, 31.0, 29.6, 28.2, 27.7, 14.0. IR (KBr, cm<sup>-1</sup>): 2934, 1731, 1446, 1250, 1095, 864. HRMS (ESI, *m/z*) calc for C<sub>17</sub>H<sub>24</sub>O<sub>4</sub> [M+Na]<sup>+</sup>: 315.1572, found: 315.1571.



### 6,6-Dimethyl-6,7,8,9-tetrahydro-5*H*-cyclohepta[*a*]naphthalen-5-ol (**2p**).

Following the typical procedure method II, diene **2p** (0.083g, 0.35 mmol) was obtained from enyne **1p** (0.25 g, 0.80 mmol) as a colorless oil in 43% yield. <sup>1</sup>H NMR (500 MHz, CDCl<sub>3</sub>) δ 7.38 – 7.35 (m, 1H), 7.30 – 7.26 (m, 2H), 7.23 – 7.19 (m, 1H), 6.47 (d, *J* =

11.0 Hz, 1H), 6.29 – 6.23 (m, 1H), 4.28 (d,  $J = 8.0$  Hz, 1H), 2.34 – 2.24 (m, 2H), 2.16 – 2.05 (m, 4H), 1.70 (d,  $J = 8.1$  Hz, 1H), 1.19 (s, 3H), 1.08 (s, 3H).  $^{13}\text{C}$  NMR (125 MHz,  $\text{CDCl}_3$ )  $\delta$  147.1, 135.7, 134.1, 133.4, 128.2, 128.0, 127.6, 126.8, 126.6, 123.2, 77.8, 41.0, 36.1, 27.7, 27.6, 24.9, 21.0. IR (KBr,  $\text{cm}^{-1}$ ): 3464, 2928, 1484, 1298, 1043, 739, 613. HRMS (ESI)  $m/z$  calc'd for  $\text{C}_{17}\text{H}_{20}\text{O}$   $[\text{M}+\text{Na}]^+$ : 263.1406, found: 263.1411



**((3,3-Dimethyl-2,3,4,7-tetrahydro-1H-dibenzo[a,c][7]annulen-2-yl)oxy)trimethylsilane (2q).**

Following the typical procedure method III, diene **2q** (0.195 g, 0.23 mmol) was obtained from enyne **1q** (0.231 g, 0.74 mmol) as a colorless oil in 84% yield.  $^1\text{H}$  NMR (500 MHz,  $\text{CDCl}_3$ )  $\delta$  7.50 (dd,  $J = 7.6, 1.5$  Hz, 1H), 7.31 – 7.24 (m, 2H), 7.17 (dd,  $J = 7.2, 1.7$  Hz, 1H), 5.84 (dt,  $J = 9.7, 6.7$  Hz, 1H), 5.76 (d,  $J = 9.8$  Hz, 1H), 3.78 – 3.70 (m, 1H), 3.20 – 2.60 (m, 4H), 2.26 (s, 2H), 1.03 (s, 3H), 1.02 (s, 3H), 0.17 (s, 9H).  $^{13}\text{C}$  NMR (125 MHz,  $\text{CDCl}_3$ )  $\delta$  139.6, 138.5, 132.8, 132.2, 129.5, 127.5, 126.9, 126.4, 125.7, 125.5, 74.4, 37.1, 34.3, 34.1, 27.1, 0.4. IR (KBr,  $\text{cm}^{-1}$ ): 2956, 1448, 1082, 839, 756, 718. HRMS (ESI,  $m/z$ ) calc for  $\text{C}_{20}\text{H}_{28}\text{OSi}$   $[\text{M}+\text{Na}]^+$ : 335.1802, found: 335.1800.



**(Z)-3,3-Dimethyl-2,3,4,5,6,7-hexahydro-1H-cyclopenta[8]annulen-2-ol (2r).**

Following the typical procedure method IV, diene **2r** (0.133 g, 0.69 mmol) was obtained from enyne **1r** (0.528 g, 2.0 mmol) as a colorless oil in 34% yield.  $^1\text{H}$  NMR (500 MHz,  $\text{CDCl}_3$ )  $\delta$  5.76 (d,  $J = 11.2$  Hz, 1H), 5.55 (dt,  $J = 11.2, 7.2$  Hz, 1H), 3.87 (q,  $J = 6.2$  Hz, 1H), 2.57 (dd,  $J = 15.5, 6.6$  Hz, 1H), 2.23 – 2.15 (m, 3H), 2.10 (t,  $J = 5.7$  Hz, 2H), 1.65 – 1.48 (m, 5H), 1.01 (s, 3H), 0.98 (s, 3H).  $^{13}\text{C}$  NMR (125 MHz,  $\text{CDCl}_3$ )  $\delta$  144.0, 130.0, 128.1, 126.5, 79.8, 50.3, 42.5, 27.8, 25.6, 25.0, 24.9, 23.2, 19.0. IR (KBr,

cm<sup>-1</sup>): 3391, 2925, 1448, 1060, 745. HRMS (ESI, m/z) calc for C<sub>13</sub>H<sub>20</sub>O [M+Na]<sup>+</sup>: 215.1406, found:215.1405

## 5. Syntheses of Skeletally Diverse, Privileged Scaffolds from **2g** and **2h**.



To a stirred solution of diene **2g** (0.72 g, 1.79 mmol) in CH<sub>2</sub>Cl<sub>2</sub> (300 mL) at 0 °C was treated methylene blue (0.050 g), and the mixture was irradiated with a 300 W tungsten lamp while bubbled with O<sub>2</sub> until no starting material left. Then Et<sub>3</sub>N (1.24 mL, 9.0 mmol) was added<sup>4</sup> and the mixture was stirred at rt overnight. The solvent was removed *in vacuo*. Purification of the residue by flash chromatography (PE/EtOAc = 20:1~4:1) afforded the **5b** (0.28 g, 0.65 mmol, 36%) as a white solid and **5a** (0.19 g, 0.44 mmol, 24%) as a colorless oil.

***rac*-(1*S*,8*aS*)-1-(((*tert*-Butyldiphenylsilyl)oxy)methyl)-8*a*-hydroxy-2,3,6,7,8,8*a*-hexahydroazulen-5(1*H*)-one (5*b*).** M.P. 103 – 105 °C. <sup>1</sup>H NMR (500 MHz, CDCl<sub>3</sub>) δ 7.68 – 7.64 (m, 4H), 7.46 – 7.38 (m, 6H), 5.92 (s, 1H), 3.77 (dd, *J* = 10.4, 7.8 Hz, 1H), 3.70 (dd, *J* = 10.4, 5.9 Hz, 1H), 3.05 (ddd, *J* = 16.9, 10.7, 2.5 Hz, 1H), 2.74 – 2.65 (m, 1H), 2.53 (dddd, *J* = 18.1, 7.6, 3.8, 1.4 Hz, 1H), 2.46 – 2.38 (m, 1H), 2.35 – 2.25 (m, 1H), 2.08 – 2.00 (m, 2H), 1.95 – 1.87 (m, 1H), 1.83 – 1.70 (m, 2H), 1.44 – 1.34 (m, 1H), 1.06 (s, 9H). <sup>13</sup>C NMR (125 MHz, CDCl<sub>3</sub>) δ 205.3, 163.0, 135.5, 135.5, 133.0, 133.0, 129.8, 127.8, 127.8, 125.5, 81.8, 63.4, 55.3, 41.7, 32.3, 31.7, 26.8, 24.8, 19.1. IR (KBr, cm<sup>-1</sup>): 3406, 2930, 1656, 1427, 1111, 832, 702, 504. HRMS (ESI, *m/z*) calc for C<sub>27</sub>H<sub>34</sub>O<sub>3</sub>Si [M+Na]<sup>+</sup>: 457.2169, found: 457.2168.

***rac*-(1*S*,8*aR*)-1-(((*tert*-Butyldiphenylsilyl)oxy)methyl)-8*a*-hydroxy-2,3,6,7,8,8*a*-hexahydroazulen-5(1*H*)-one (5*a*).** <sup>1</sup>H NMR (500 MHz, CDCl<sub>3</sub>) δ 7.70 – 7.66 (m, 4H), 7.47 – 7.40 (m, 6H), 5.91 (s, 1H), 4.04 (dd, *J* = 11.0, 3.4 Hz, 1H), 3.98 (brs, 1H), 3.87 (dd, *J* = 11.0, 4.0 Hz, 1H), 3.01 (ddd, *J* = 15.1, 8.4, 4.1 Hz, 1H), 2.78 (ddt, *J* = 18.3, 9.0, 2.0 Hz, 1H), 2.51 – 2.41 (m, 2H), 2.33 (ddd, *J* = 14.2, 5.9, 4.4 Hz, 1H), 2.27 – 2.13 (m, 2H), 1.85 – 1.71 (m, 3H), 1.67 (ddd, *J* = 14.3, 9.9, 4.5 Hz, 1H), 1.08 (s, 9H). <sup>13</sup>C NMR (125 MHz, CDCl<sub>3</sub>) δ 203.1, 164.4, 135.5, 135.5, 132.4, 132.2, 123.0, 129.9, 127.8, 125.9, 81.1, 62.9, 51.5, 43.6, 36.9, 31.9, 26.7, 24.5, 19.0, 18.9. IR (KBr, cm<sup>-1</sup>): 3439, 2929, 1655, 1471, 1255, 1093, 837, 776. HRMS (ESI, *m/z*) calc for C<sub>27</sub>H<sub>34</sub>O<sub>3</sub>Si [M+Na]<sup>+</sup>: 457.2169, found: 457.2164.



To a stirred solution of diene **2h** (1.0 g, 3.59 mmol) in CH<sub>2</sub>Cl<sub>2</sub> (20 mL) at 0 °C was added NaHCO<sub>3</sub> (0.60 g, 7.2 mmol) and *m*-CPBA (0.84 g, 3.66 mmol, contains ca. 25% water). After being stirred for 10 min, the mixture was filtered through a pad of basic aluminium oxide and washed with PE/EtOAc = 20:1. The filtrate was concentrated *in*

*vacuo*. Purification of the residue by column chromatography (aluminium oxide, basic. PE/EtOAc = 100:1) afforded the  $\alpha$ -epoxide **6a** (0.19 g, 0.65 mmol, 18%) as a colorless oil and  $\beta$ -epoxide **6b** (0.29 g, 0.99 mmol, 27%) as a colorless oil.

**tert-butyl dimethyl(((3*S*,3*aR*,8*aR*)-2,3,5,6-tetrahydro-1*H*,4*H*-3*a*,8*a*-epoxyazulen-3-yl)methoxy)silane (6a).** <sup>1</sup>H NMR (400 MHz, CDCl<sub>3</sub>)  $\delta$  5.89 – 5.81 (ddd,  $J = 11.6, 7.2, 2.8$  Hz, 1H), 5.74 – 5.68 (dd,  $J = 11.6, 2.8$  Hz, 1H), 3.86 – 3.80 (dd,  $J = 10.0, 7.2$  Hz, 1H), 3.59 – 3.53 (dd,  $J = 10.0, 6.8$  Hz, 1H), 2.47 – 2.38 (m, 1H), 2.35 – 2.25 (m, 1H), 2.22 – 2.16 (m, 1H), 2.07 – 1.89 (m, 4H), 1.75 – 1.62 (m, 3H), 1.09 – 0.98 (m, 1H), 0.92 (s, 9H), 0.08 (s, 3H). <sup>13</sup>C NMR (150 MHz, CDCl<sub>3</sub>)  $\delta$  136.5, 125.7, 75.2, 69.8, 63.7, 46.8, 31.8, 31.1, 30.4, 25.9, 23.2, 22.6, -5.4. IR (KBr, cm<sup>-1</sup>): 2925, 2354, 1542, 810. HRMS (ESI,  $m/z$ ) calc for C<sub>17</sub>H<sub>30</sub>O<sub>2</sub>Si [M+Na]<sup>+</sup>: 317.1907, found: 317.1913.

**tert-butyl dimethyl(((3*S*,3*aS*,8*aS*)-2,3,5,6-tetrahydro-1*H*,4*H*-3*a*,8*a*-epoxyazulen-3-yl)methoxy)silane (6b).** <sup>1</sup>H NMR (400 MHz, CDCl<sub>3</sub>)  $\delta$  5.88 – 5.80 (ddd,  $J = 11.6, 7.1, 2.6$  Hz, 1H), 5.76 – 5.71 (dd,  $J = 11.6, 2.8$  Hz, 1H), 3.74 – 3.68 (dd,  $J = 10.1, 4.6$  Hz, 1H), 3.67 – 3.62 (dd,  $J = 10.1, 3.8$  Hz, 1H), 2.35 – 2.25 (m, 1H), 2.23 – 2.16 (m, 2H), 2.10 – 1.89 (m, 4H), 1.73 – 1.65 (m, 2H), 1.62 – 1.56 (m, 1H), 1.47 – 1.40 (m, 1H), 0.89 (s, 9H), 0.06 (s, 6H). <sup>13</sup>C NMR (100 MHz, CDCl<sub>3</sub>)  $\delta$  136.8, 125.4, 75.8, 70.0, 64.2, 47.3, 32.9, 31.4, 29.2, 25.9, 23.8, 22.0, 18.1, -5.6. IR (KBr, cm<sup>-1</sup>): 2917, 1577, 1031, 419. HRMS (ESI,  $m/z$ ) calc for C<sub>17</sub>H<sub>30</sub>O<sub>2</sub>Si [M+Na]<sup>+</sup>: 317.1907, found: 317.1902.

To a stirred solution of  $\beta$ -epoxide **6b** (0.294 g, 1.0 mmol) in CH<sub>2</sub>Cl<sub>2</sub> (10 mL) at -78 °C was added BF<sub>3</sub>•OEt<sub>2</sub> (0.16 mL, 48% boron fluoride in Et<sub>2</sub>O) dropwise. After being stirred for 0.5 h, the mixture was quenched with aqueous NaOH solution (5 mL, 1 M) and then extracted with CH<sub>2</sub>Cl<sub>2</sub>. The combined organic layers were washed with brine, dried over MgSO<sub>4</sub> and concentrated *in vacuo*. Purification of the residue by column chromatography (PE/EtOAc = 50:1) afforded the spiro compound **7** (0.12 g, 40%) as a colorless oil.

**rac-(2*S*,5*S*)-2-(((tert-Butyldimethylsilyloxy)methyl)spiro[4.5]dec-6-en-1-one (7).** <sup>1</sup>H NMR (500 MHz, CDCl<sub>3</sub>)  $\delta$  5.92 (dt,  $J = 10.0, 3.8$  Hz, 1H), 5.29 (dt,  $J = 10.0, 2.1$  Hz, 1H), 3.93 (dd,  $J = 9.9, 4.0$  Hz, 1H), 3.68 (dd,  $J = 9.9, 3.3$  Hz, 1H), 2.31 – 2.25 (m,

1H), 2.08 – 1.98 (m, 4H), 1.89 (ddd,  $J = 12.8, 5.3, 3.2$  Hz, 1H), 1.82 – 1.69 (m, 4H), 1.55 – 1.47 (m, 1H), 1.42 – 1.36 (m, 1H), 0.86 (s, 9H), 0.03 (s, 3H), 0.01 (s, 3H).  $^{13}\text{C}$  NMR (125 MHz,  $\text{CDCl}_3$ )  $\delta$  220.8, 130.1, 128.9, 61.3, 51.1, 51.0, 35.9, 28.6, 25.8, 24.7, 21.8, 18.4, 18.2, -5.5, -5.6. IR (KBr,  $\text{cm}^{-1}$ ): 2927, 1737, 1463, 1255, 1092, 836, 775. HRMS (ESI,  $m/z$ ) calc for  $\text{C}_{17}\text{H}_{30}\text{O}_2\text{Si}$   $[\text{M}+\text{Na}]^+$ : 317.1907, found: 317.1903.



A stirred solution of diene **2g** (0.20 g, 0.50 mmol) in *n*-hexane equipped in quartz reaction tube was degassed with argon for 5 min and then irradiated with 365 nm UV lamp (8 W  $\times$  4) for 12 h. TLC showed no starting materials left, the solvent was removed *in vacuo*. Purification of the residue by flash chromatography (PE/EtOAc = 100:1) afforded two inseparable diastereoisomers **8** (0.12 g, 60%) as a colorless oil.

***rac-tert*-Butyl(((4*aS*,7*aS*)-2,3,4*a*,5,6,7-hexahydro-1*H*-cyclobuta[1,2:1,4]di[5]annulen-1-yl)methoxy)diphenylsilane (**8**)**.  $^1\text{H}$  NMR (500 MHz,  $\text{CDCl}_3$ )  $\delta$  7.75 – 7.60 (m, 4H), 7.50 – 7.30 (m, 6H), 5.54 – 5.48 (m, 1H), 3.74 – 3.64 (m, 1H), 3.64 – 3.40 (m, 1H), 2.84 – 2.54 (m, 1H), 2.20 – 2.12 (m, 1H), 2.12 – 1.9 (m, 3H), 1.75 – 1.54 (m, 5H), 1.28 – 1.14 (m, 2H), 1.06 (s, 9H).  $^{13}\text{C}$  NMR (125 MHz,  $\text{CDCl}_3$ )  $\delta$  158.8, 156.3, 135.6, 134.2, 134.1, 129.5, 127.6, 124.3, 123.6, 65.0, 64.7, 60.8, 60.5, 47.0, 45.4, 44.0, 42.5, 32.5, 32.0, 31.6, 26.9, 26.8, 26.6, 26.5, 24.6, 24.0, 23.8, 23.4, 23.1, 19.2. HRMS (ESI,  $m/z$ ) calc for  $\text{C}_{27}\text{H}_{34}\text{OSi}$   $[\text{M}+\text{Na}]^+$ : 425.2271, found: 425.2276.

## 6. Construction of the Core Skeleton of Pseudolaric Acid F.



To a stirred solution of **5b** (0.435 g, 1.0 mmol) in toluene (15 mL) was added DMAP (0.122 g, 1.0 mmol),  $\text{Et}_3\text{N}$  (0.56 mL, 4.0 mmol) and  $\text{Ac}_2\text{O}$  (0.28 mL, 3.0 mmol) successively, and the mixture was heated to reflux for 5 h. After being cooled to rt, the mixture was quenched with  $\text{H}_2\text{O}$  (20 mL) and extracted with  $\text{Et}_2\text{O}$ . The combined organic layers were washed with brine, dried over  $\text{MgSO}_4$  and concentrated *in vacuo* to give the crude acetylation product.

The above crude acetylation product was dissolved with THF (10 mL), AcOH (0.17 mL, 3.0 mmol) and TBAF (1.5 mL, 1 M in THF) was added successively. The mixture was heated at  $50^\circ\text{C}$  for 2 h. After being cooled to rt, the mixture was quenched with  $\text{H}_2\text{O}$  (10 mL) and extracted with  $\text{Et}_2\text{O}$ . The combined organic layers were washed with brine, dried over  $\text{MgSO}_4$  and concentrated *in vacuo*. Purification of the residue by column chromatography (PE/ $\text{EtOAc}$  = 4:1~1:1) afforded the alcohol **9** (0.238 g, 99%) as a colorless oil.

***rac*-(3*S*,3*aS*)-3-(Hydroxymethyl)-7-oxo-2,3,4,5,6,7-hexahydroazulen-3*a*(1*H*)-yl acetate (**9**).** <sup>1</sup>H NMR (500 MHz, CDCl<sub>3</sub>) δ 5.97 – 5.91 (m, 1H), 3.81 (dd, *J* = 11.0, 6.8 Hz, 1H), 3.62 (dd, *J* = 11.0, 6.7 Hz, 1H), 3.05 – 2.98 (m, 1H), 2.96 – 2.87 (m, 1H), 2.84 – 2.76 (m, 1H), 2.53 – 2.43 (m, 3H), 2.05 – 1.99 (m, 1H), 1.97 (s, 3H), 1.92 – 1.86 (m, 1H), 1.85 – 1.73 (m, 3H), 1.43 – 1.34 (m, 1H). <sup>13</sup>C NMR (125 MHz, CDCl<sub>3</sub>) δ 204.1, 169.7, 161.0, 125.9, 89.0, 61.8, 50.2, 40.6, 32.4, 28.5, 25.9, 21.8, 18.6. IR (KBr, cm<sup>-1</sup>): 3439, 2950, 1734, 1661, 1236, 1049, 960. HRMS (ESI, *m/z*) calc for C<sub>13</sub>H<sub>18</sub>O<sub>4</sub> [M+Na]<sup>+</sup>: 261.1097, found: 261.1099.



To a stirred solution of alcohol **9** (0.219 g, 0.92 mmol) in THF (10 mL) at rt was added CDI (0.448 g, 2.76 mmol), and the mixture was stirred for 12 h. When TLC showed no starting material left, the solvent was removed *in vacuo*. Purification of the residue by flash chromatography (PE/EtOAc = 2:1~1:1) afforded the product **10** (0.246 g, 0.74 mmol, 81%) as a yellow oil.

***rac*-((1*S*,8*aS*)-8*a*-Acetoxy-5-oxo-1,2,3,5,6,7,8,8*a*-octahydroazulen-1-yl)methyl 1*H*-imidazole-1-carboxylate (**10**).** <sup>1</sup>H NMR (500 MHz, CDCl<sub>3</sub>) δ 8.10 (s, 1H), 7.38 (t, *J* = 1.4 Hz, 1H), 7.07 (dd, *J* = 1.5, 0.7 Hz, 1H), 5.94 (s, 1H), 4.54 (dd, *J* = 11.1, 7.2 Hz, 1H), 4.46 (dd, *J* = 11.1, 7.2 Hz, 1H), 3.43 – 3.35 (m, 1H), 3.06 – 2.96 (m, 1H), 2.83 – 2.75 (m, 1H), 2.55 (dd, *J* = 17.2, 7.3 Hz, 1H), 2.50 – 2.43 (m, 1H), 2.40 – 2.31 (m, 1H), 2.12 – 2.05 (m, 1H), 1.98 – 1.94 (m, 1H), 1.92 (s, 3H), 1.85 – 1.77 (m, 2H), 1.43 (ddd, *J* = 24.1, 11.8, 7.3 Hz, 1H). <sup>13</sup>C NMR (125 MHz, CDCl<sub>3</sub>) δ 204.0, 169.2, 158.8, 148.3, 136.9, 130.8, 125.6, 116.9, 88.1, 67.0, 46.0, 39.9, 32.0, 28.6, 26.0, 21.5, 18.7. IR (KBr, cm<sup>-1</sup>): 2921, 1762, 1736, 1665, 1377, 1239, 1004, 769. HRMS (ESI, *m/z*) calc for C<sub>17</sub>H<sub>20</sub>N<sub>2</sub>O<sub>5</sub> [M+Na]<sup>+</sup>: 355.1264, found: 355.1265.



To a stirred solution of  $(\text{PhSe})_2$  (188 mg, 0.60 mmol) in DMF (5 mL) at rt was added with  $\text{NaBH}_4$  (23 mg, 0.62 mmol).<sup>5</sup> The mixture was stirred for 10 min and then transferred to a stirred solution of starting material **10** (100 mg, 0.301 mmol) in DMF (5 mL). The reaction mixture was stirred for 0.5 h and TLC showed no starting material left. The mixture was diluted with  $\text{Et}_2\text{O}$  (10 mL) and then quenched with saturated  $\text{NaHCO}_3$  solution (10 mL) and extracted with  $\text{Et}_2\text{O}$ . The combined organic layers were washed with brine, dried over  $\text{MgSO}_4$  and concentrated *in vacuo*. Purification of the residue by column chromatography (PE/ $\text{EtOAc}$  = 8:1~4:1) afforded the product **11** (90 mg, 0.213 mmol, 71%) as a colorless oil..

***rac*-(3*S*,3*aS*)-7-Oxo-3-(((phenylselenanyl)carbonyl)oxy)methyl)-2,3,4,5,6,7-**

**hexahydroazulen-3*a*(1*H*)-yl acetate (**11**).  $^1\text{H}$  NMR (500 MHz,  $\text{CDCl}_3$ )  $\delta$  7.66 – 7.62 (m, 2H), 7.44 – 7.37 (m, 3H), 5.95 (s, 1H), 4.42 (dd,  $J$  = 11.1, 6.8 Hz, 1H), 4.35 (dd,  $J$  = 11.1, 6.7 Hz, 1H), 3.31 – 3.23 (m, 1H), 3.03 – 2.93 (m, 1H), 2.83 (ddd,  $J$  = 17.0, 12.4, 3.2 Hz, 1H), 2.55 – 2.46 (m, 2H), 2.35 – 2.29 (m, 1H), 2.04 – 1.99 (m, 4H), 1.97 – 1.91 (m, 1H), 1.84 – 1.67 (m, 3H).  $^{13}\text{C}$  NMR (125 MHz,  $\text{CDCl}_3$ )  $\delta$  204.2, 169.2, 166.7, 159.6, 135.7, 129.3, 129.2, 125.7, 125.6, 88.1, 66.5, 46.2, 40.1, 32.1, 28.6, 25.8, 21.7, 18.7. IR (KBr,  $\text{cm}^{-1}$ ): 2926, 1734, 1666, 1367, 1236, 1119, 1020, 741, 690. HRMS (ESI,  $m/z$ ) calc for  $\text{C}_{20}\text{H}_{22}\text{O}_5\text{Se}$   $[\text{M}+\text{Na}]^+$ : 445.0525, found: 445.0519.**



To a stirred solution of compound **11** (90 mg, 0.213 mmol) in toluene (10 mL) at rt was added with AIBN (18 mg, 0.107 mmol) and  $(\text{TMS})_3\text{SiH}$  (0.154 mL, 0.426 mmol) successively. The resulting mixture was heated to reflux for 12 h. After being cooled to rt, the mixture was concentrated *in vacuo*. Purification of the residue by flash

chromatography (PE/EtOAc = 8:1~4:1) afforded the tricyclic compound **10** (26 mg, 0.098 mmol, 46%) as a white solid.

***rac*-(4*S*,4*aS*,9*aR*)-1,8-Dioxohexahydro-1*H*-4,9*a*-ethanocyclohepta[*c*]pyran-4*a*(5*H*)-yl acetate (12)**. M.P. 108 – 110 °C; <sup>1</sup>H NMR (400 MHz, CDCl<sub>3</sub>) δ 4.52 – 4.45 (m, 1H), 4.22 (d, *J* = 11.4 Hz, 1H), 3.42 (dd, *J* = 6.2, 2.9 Hz, 1H), 3.19 – 3.12 (m, 1H), 3.05 (d, *J* = 17.4 Hz, 1H), 2.77 (d, *J* = 17.4 Hz, 1H), 2.60 (dd, *J* = 16.5, 6.4 Hz, 1H), 2.38 – 2.28 (m, 1H), 2.23 – 2.05 (m, 5H), 2.00 – 1.91 (m, 1H), 1.85 – 1.76 (m, 2H), 1.72 – 1.63 (m, 2H). <sup>13</sup>C NMR (100 MHz, CDCl<sub>3</sub>) δ 209.2, 173.8, 169.5, 88.6, 73.0, 55.1, 44.3, 43.1, 42.5, 37.0, 30.8, 26.5, 21.7, 18.2. IR (KBr, cm<sup>-1</sup>): 2921, 1736, 1697, 1229, 1180, 1028, 945. HRMS (ESI) *m/z* calc'd for C<sub>14</sub>H<sub>18</sub>O<sub>5</sub> [M+Na]<sup>+</sup>: 289.1046, found: 289.1039.

## 7. X-ray Crystal Structures

Fig. S1 X-ray crystallographic structure of **2i** (CCDC 1907870).



Table 2. Crystal data and structure refinement for **2i**.

|                                             |                                                               |
|---------------------------------------------|---------------------------------------------------------------|
| Identification code                         | a                                                             |
| Empirical formula                           | C <sub>16</sub> H <sub>18</sub> O                             |
| Formula weight                              | 226.30                                                        |
| Temperature/K                               | 273.15                                                        |
| Crystal system                              | trigonal                                                      |
| Space group                                 | R3                                                            |
| a/Å                                         | 20.961(8)                                                     |
| b/Å                                         | 20.961(8)                                                     |
| c/Å                                         | 7.086(3)                                                      |
| α/°                                         | 90.00                                                         |
| β/°                                         | 90.00                                                         |
| γ/°                                         | 120.00                                                        |
| Volume/Å <sup>3</sup>                       | 2696.0(18)                                                    |
| Z                                           | 9                                                             |
| ρ <sub>calc</sub> /cm <sup>3</sup>          | 1.254                                                         |
| μ/mm <sup>-1</sup>                          | 0.076                                                         |
| F(000)                                      | 1098.0                                                        |
| Crystal size/mm <sup>3</sup>                | 0.12 × 0.11 × 0.1                                             |
| Radiation                                   | MoKα (λ = 0.71073)                                            |
| 2θ range for data collection/°              | 3.88 to 58.2                                                  |
| Index ranges                                | -28 ≤ h ≤ 15, -21 ≤ k ≤ 27, -9 ≤ l ≤ 9                        |
| Reflections collected                       | 5824                                                          |
| Independent reflections                     | 2880 [R <sub>int</sub> = 0.0519, R <sub>sigma</sub> = 0.0935] |
| Data/restraints/parameters                  | 2880/1/157                                                    |
| Goodness-of-fit on F <sup>2</sup>           | 0.936                                                         |
| Final R indexes [I ≥ 2σ (I)]                | R <sub>1</sub> = 0.0714, wR <sub>2</sub> = 0.1619             |
| Final R indexes [all data]                  | R <sub>1</sub> = 0.1082, wR <sub>2</sub> = 0.1846             |
| Largest diff. peak/hole / e Å <sup>-3</sup> | 0.43/-0.18                                                    |
| Flack parameter                             | -1(3)                                                         |

Fig. S2 X-ray crystallographic structure of 5b (CCDC 1907871).



Table 3. Crystal data and structure refinement for 5b.

|                                             |                                                               |
|---------------------------------------------|---------------------------------------------------------------|
| Identification code                         | mon                                                           |
| Empirical formula                           | C <sub>27</sub> H <sub>34</sub> O <sub>3</sub> Si             |
| Formula weight                              | 434.63                                                        |
| Temperature/K                               | 293(2)                                                        |
| Crystal system                              | monoclinic                                                    |
| Space group                                 | C2/c                                                          |
| a/Å                                         | 42.742(3)                                                     |
| b/Å                                         | 10.4771(9)                                                    |
| c/Å                                         | 10.9037(9)                                                    |
| α/°                                         | 90                                                            |
| β/°                                         | 93.609(6)                                                     |
| γ/°                                         | 90                                                            |
| Volume/Å <sup>3</sup>                       | 4873.1(7)                                                     |
| Z                                           | 8                                                             |
| ρ <sub>calc</sub> /cm <sup>3</sup>          | 1.185                                                         |
| μ/mm <sup>-1</sup>                          | 0.121                                                         |
| F(000)                                      | 1872.0                                                        |
| Crystal size/mm <sup>3</sup>                | 0.3 × 0.3 × 0.2                                               |
| Radiation                                   | MoKα (λ = 0.71073)                                            |
| 2θ range for data collection/°              | 6 to 51.992                                                   |
| Index ranges                                | -52 ≤ h ≤ 45, -12 ≤ k ≤ 10, -13 ≤ l ≤ 11                      |
| Reflections collected                       | 10004                                                         |
| Independent reflections                     | 4772 [R <sub>int</sub> = 0.0366, R <sub>sigma</sub> = 0.0567] |
| Data/restraints/parameters                  | 4772/0/333                                                    |
| Goodness-of-fit on F <sup>2</sup>           | 1.105                                                         |
| Final R indexes [I ≥ 2σ (I)]                | R <sub>1</sub> = 0.0697, wR <sub>2</sub> = 0.1464             |
| Final R indexes [all data]                  | R <sub>1</sub> = 0.0939, wR <sub>2</sub> = 0.1574             |
| Largest diff. peak/hole / e Å <sup>-3</sup> | 0.44/-0.40                                                    |

Fig. S3 X-ray crystallographic structure of 12 (CCDC 1907872).



Table 4. Crystal data and structure refinement for 12.

|                                             |                                                               |
|---------------------------------------------|---------------------------------------------------------------|
| Identification code                         | lmg                                                           |
| Empirical formula                           | C <sub>14</sub> H <sub>18</sub> O <sub>5</sub>                |
| Formula weight                              | 266.28                                                        |
| Temperature/K                               | 185.1(6)                                                      |
| Crystal system                              | triclinic                                                     |
| Space group                                 | P-1                                                           |
| a/Å                                         | 7.3423(10)                                                    |
| b/Å                                         | 8.4321(9)                                                     |
| c/Å                                         | 10.4623(11)                                                   |
| α/°                                         | 85.681(8)                                                     |
| β/°                                         | 85.985(10)                                                    |
| γ/°                                         | 78.332(10)                                                    |
| Volume/Å <sup>3</sup>                       | 631.54(13)                                                    |
| Z                                           | 2                                                             |
| ρ <sub>calc</sub> /cm <sup>3</sup>          | 1.400                                                         |
| μ/mm <sup>-1</sup>                          | 0.106                                                         |
| F(000)                                      | 284.0                                                         |
| Crystal size/mm <sup>3</sup>                | 0.7 × 0.4 × 0.2                                               |
| Radiation                                   | MoKα (λ = 0.71073)                                            |
| 2θ range for data collection/°              | 6.108 to 54.99                                                |
| Index ranges                                | -4 ≤ h ≤ 9, -10 ≤ k ≤ 10, -13 ≤ l ≤ 13                        |
| Reflections collected                       | 4909                                                          |
| Independent reflections                     | 2890 [R <sub>int</sub> = 0.0272, R <sub>sigma</sub> = 0.0428] |
| Data/restraints/parameters                  | 2890/0/173                                                    |
| Goodness-of-fit on F <sup>2</sup>           | 1.034                                                         |
| Final R indexes [I ≥ 2σ (I)]                | R <sub>1</sub> = 0.0443, wR <sub>2</sub> = 0.1051             |
| Final R indexes [all data]                  | R <sub>1</sub> = 0.0525, wR <sub>2</sub> = 0.1100             |
| Largest diff. peak/hole / e Å <sup>-3</sup> | 0.30/-0.22                                                    |

## 8. Theoretical Calculations

### 8.1 Computational methods

All of the structures were optimized at the B3LYP/6-311++G(d,p) level of DFT.<sup>6</sup> The frequency calculations were performed to confirm the characteristics of the calculated structures as minima. The Gibbs Free Energies (GFEs) are all calculated in gas phase without any solvent. All the optimizations were performed with the Gaussian 09 software package.<sup>7</sup>

### 8.2 DFT calculated results



### 8.3 Cartesian coordinates

H<sub>2</sub>C=CH<sub>2</sub>

H<sub>2</sub>C=CH<sub>2</sub>

E = -78.61553852 (G = -78.586288)

|   |           |           |          |
|---|-----------|-----------|----------|
| C | 0.000000  | 0.664397  | 0.000000 |
| H | 0.922912  | 1.235124  | 0.000000 |
| H | -0.922864 | 1.235183  | 0.000000 |
| C | 0.000000  | -0.664397 | 0.000000 |
| H | -0.922912 | -1.235124 | 0.000000 |
| H | 0.922864  | -1.235183 | 0.000000 |

F



E = -389.5201430 (G = -389.346557)

|   |           |           |           |
|---|-----------|-----------|-----------|
| C | -3.077439 | -0.052312 | 0.359555  |
| C | -1.878717 | -1.019804 | 0.203072  |
| C | -0.824983 | -0.175474 | -0.494274 |
| C | -1.158736 | 1.118867  | -0.463581 |
| C | -2.469883 | 1.369653  | 0.242028  |
| H | -3.627111 | -0.204158 | 1.290904  |
| H | -2.136616 | -1.920372 | -0.365405 |
| H | -1.511467 | -1.367284 | 1.178493  |
| H | -0.545094 | 1.917310  | -0.867610 |
| H | -3.123380 | 2.058788  | -0.302333 |
| H | -2.299005 | 1.822314  | 1.228453  |
| H | -3.780738 | -0.212737 | -0.462331 |
| C | 0.418505  | -0.772317 | -1.090411 |
| H | 0.970755  | -0.001211 | -1.635742 |
| H | 0.131129  | -1.534757 | -1.825970 |
| C | 1.357536  | -1.438837 | -0.064647 |
| H | 2.166632  | -1.945046 | -0.599439 |
| H | 0.814748  | -2.211840 | 0.489244  |
| C | 1.970743  | -0.458599 | 0.958247  |
| H | 1.169771  | 0.069726  | 1.487474  |
| H | 2.522417  | -1.026569 | 1.715406  |
| C | 2.871963  | 0.524798  | 0.361984  |
| C | 3.619065  | 1.324395  | -0.138277 |
| H | 4.279634  | 2.033626  | -0.573328 |

G



E = -468.1907883 (G = -467.964650)

|   |           |           |           |
|---|-----------|-----------|-----------|
| C | -3.669404 | 0.789927  | 0.744205  |
| C | -2.297974 | 0.224326  | 1.187659  |
| C | -1.877706 | -0.654325 | 0.021447  |
| C | -2.642652 | -0.417923 | -1.049281 |
| C | -3.692198 | 0.638567  | -0.798983 |
| H | -3.830158 | 1.818971  | 1.072639  |
| H | -2.357010 | -0.331161 | 2.130202  |
| H | -1.562886 | 1.024548  | 1.348384  |
| H | -4.680895 | 0.357762  | -1.175935 |
| H | -3.425609 | 1.577327  | -1.303868 |
| H | -4.468507 | 0.182263  | 1.177851  |
| C | -0.728130 | -1.616738 | 0.120191  |
| H | -0.643061 | -2.178966 | -0.816430 |
| H | -0.948884 | -2.351196 | 0.906203  |
| C | 0.630140  | -0.963176 | 0.450386  |
| H | 1.369964  | -1.755194 | 0.605983  |
| H | 0.561324  | -0.421453 | 1.400170  |
| C | 1.129548  | -0.000993 | -0.641652 |
| H | 1.193215  | -0.550706 | -1.591114 |
| H | 0.397507  | 0.796066  | -0.794453 |
| C | 2.483100  | 0.604934  | -0.335445 |
| C | 2.633839  | 1.915562  | -0.102997 |
| H | 1.782796  | 2.588117  | -0.099299 |
| H | 3.609597  | 2.355043  | 0.070086  |
| H | -2.512273 | -0.899884 | -2.012995 |
| C | 3.629517  | -0.328188 | -0.334725 |
| H | 3.576650  | -1.134033 | -1.066286 |
| C | 4.682479  | -0.282329 | 0.485403  |
| H | 5.491840  | -0.998680 | 0.402304  |
| H | 4.763042  | 0.463311  | 1.269302  |

H



E = -468.1953317 (G = -467.969134)

|   |           |           |           |   |           |           |           |
|---|-----------|-----------|-----------|---|-----------|-----------|-----------|
| C | -2.773207 | -1.353817 | 0.585531  | H | 0.321961  | 2.656974  | -0.264841 |
| C | -1.389395 | -1.860014 | 0.123016  | H | 2.581658  | 2.256130  | 0.072785  |
| C | -0.737309 | -0.633252 | -0.482633 | H | 3.646345  | 0.160617  | 0.082535  |
| C | -1.410686 | 0.491948  | -0.149629 | H | 0.738356  | -1.989696 | 1.114455  |
| C | -2.607548 | 0.175076  | 0.730118  | H | 1.910975  | -0.857111 | -1.481976 |
| H | -3.116096 | -1.833596 | 1.504662  | H | 2.703142  | -1.959060 | -0.369104 |
| H | -1.456792 | -2.690265 | -0.589429 | H | 2.574330  | -0.152434 | 1.423363  |
| H | -0.793840 | -2.232445 | 0.968285  | H | 0.363846  | -2.517250 | -0.501099 |
| H | -3.506579 | 0.719764  | 0.426675  | C | -1.927712 | -1.210416 | -0.002634 |
| H | -2.401542 | 0.466630  | 1.768591  | H | -2.133893 | -1.677900 | -0.977087 |
| H | -3.514861 | -1.567034 | -0.189269 | H | -2.083833 | -1.993729 | 0.748362  |
| C | 0.507883  | -0.763148 | -1.313648 | C | -1.926475 | 1.222106  | -0.187355 |
| H | 0.821197  | 0.210298  | -1.697762 | H | -2.130737 | 1.531627  | -1.221755 |
| H | 0.270268  | -1.373670 | -2.195566 | H | -2.085524 | 2.106343  | 0.438302  |
| C | 1.691520  | -1.441792 | -0.587698 | C | -2.811549 | 0.031531  | 0.236550  |
| H | 2.513691  | -1.558956 | -1.301406 | H | -3.761216 | -0.009472 | -0.301536 |
| H | 1.395690  | -2.453147 | -0.289049 | H | -3.044047 | 0.112593  | 1.302332  |
| C | 2.214637  | -0.699623 | 0.660180  |   |           |           |           |
| H | 1.383670  | -0.562402 | 1.363678  |   |           |           |           |
| H | 2.952520  | -1.334257 | 1.161712  |   |           |           |           |
| C | 2.835088  | 0.638909  | 0.369539  |   |           |           |           |
| H | 2.168895  | 1.410867  | -0.010136 |   |           |           |           |
| C | 4.120654  | 0.938144  | 0.547759  |   |           |           |           |
| H | 4.826475  | 0.208362  | 0.934609  |   |           |           |           |
| H | 4.513407  | 1.922866  | 0.319727  |   |           |           |           |
| C | -1.059854 | 1.852694  | -0.524538 |   |           |           |           |
| H | -0.200512 | 1.971181  | -1.179012 |   |           |           |           |
| C | -1.708056 | 2.959922  | -0.134001 |   |           |           |           |
| H | -2.573353 | 2.923639  | 0.518172  |   |           |           |           |
| H | -1.384607 | 3.941878  | -0.458452 |   |           |           |           |

I



E = -389.5743570 (G = -389.394064)

|   |           |           |           |
|---|-----------|-----------|-----------|
| C | -0.506699 | 0.681770  | -0.075966 |
| C | 0.612057  | 1.621514  | -0.098795 |
| C | 1.921174  | 1.392958  | 0.096120  |
| C | -0.513955 | -0.665010 | 0.017883  |
| C | 2.587410  | 0.066654  | 0.345849  |
| C | 0.637401  | -1.626896 | 0.081063  |
| C | 1.994788  | -1.125482 | -0.423504 |

## 9. References

- (1) J. Tormo, A. Moyano, M. A. Pericàs and A. Riera, *J. Org. Chem.*, 1997, **62**, 4851.
- (2) R. A. Bunce and C. L. Schilling III, *J. Org. Chem.*, 1995, **60**, 2748.
- (3) T. J. Michnick and D. S. Matteson, *Synlett*, 1991, **8**, 631.
- (4) (a) H. S. Bansal and A. J. Pearson, *Tetrahedron Lett.* 1986, **27**, 283; (b) M. A. Avery, *J. Med. Chem.* 2010, **53**, 7864.
- (5) A. Meyer, J. Waser and B. M. Trost, *J. Am. Chem. Soc.* 2008, **130**, 16424.
- (6) (a) A. D. Becke, *J. Chem. Phys.* 1993, **98**, 5648; (b) B. Miehlich, A. Savin, H. Stoll and H. Preuss, *Chem. Phys. Lett.* 1989, **157**, 200; (c) C. Lee, W. Yang and R. G. Parr, *Phys. Rev. B.* 1988, **37**, 785.
- (7) M. J. Frisch, et al. *Gaussian 09*, revision B.01; Gaussian, Inc.: Wallingford, CT, **2009**.

## 10. NMR Spectra Data







$^1\text{H NMR}$   
(400 MHz,  $\text{CDCl}_3$ )



$^{13}\text{C NMR}$   
(100 MHz,  $\text{CDCl}_3$ )







$^1\text{H NMR}$   
(400 MHz,  $\text{CDCl}_3$ )



$^{13}\text{C NMR}$   
(100 MHz,  $\text{CDCl}_3$ )







$^1\text{H NMR}$   
(400 MHz,  $\text{CDCl}_3$ )



$^{13}\text{C NMR}$   
(100 MHz,  $\text{CDCl}_3$ )





<sup>1</sup>H NMR  
(400 MHz, CDCl<sub>3</sub>)



<sup>13</sup>C NMR  
(100 MHz, CDCl<sub>3</sub>)







<sup>1</sup>H NMR  
(400 MHz, CDCl<sub>3</sub>)



<sup>13</sup>C NMR  
(100 MHz, CDCl<sub>3</sub>)





$^1\text{H NMR}$   
(400 MHz,  $\text{CDCl}_3$ )



$^{13}\text{C NMR}$   
(100 MHz,  $\text{CDCl}_3$ )





<sup>1</sup>H NMR  
(500 MHz, CDCl<sub>3</sub>)



<sup>13</sup>C NMR  
(125 MHz, CDCl<sub>3</sub>)











173.225  
140.273  
127.924  
83.425  
68.880  
60.535  
46.349  
32.851  
32.378  
28.913  
23.176  
16.417  
14.199







<sup>1</sup>H NMR  
(500 MHz, CDCl<sub>3</sub>)



151.051  
143.965  
142.472  
137.648  
129.133  
128.787  
127.905

84.236  
84.039

68.369

49.687  
40.897  
32.174  
30.984  
29.277  
27.808  
23.202  
21.578  
16.398



<sup>1</sup>H NMR  
(500 MHz, CDCl<sub>3</sub>)





<sup>1</sup>H NMR  
(400 MHz, CDCl<sub>3</sub>)



<sup>13</sup>C NMR  
(100 MHz, CDCl<sub>3</sub>)







<sup>1</sup>H NMR  
(500 MHz, CDCl<sub>3</sub>)



<sup>13</sup>C NMR  
(125 MHz, CDCl<sub>3</sub>)





<sup>1</sup>H NMR  
(500 MHz, CDCl<sub>3</sub>)



<sup>13</sup>C NMR  
(125 MHz, CDCl<sub>3</sub>)









$^1\text{H NMR}$   
(500 MHz,  $\text{CDCl}_3$ )



$^{13}\text{C NMR}$   
(125 MHz,  $\text{CDCl}_3$ )







<sup>1</sup>H NMR  
(500 MHz, CDCl<sub>3</sub>)



— 155.447  
— 126.993  
— 84.006  
— 77.721  
— 69.383  
— 41.275  
— 29.048  
— 25.720  
— 23.819  
— 23.754  
— 19.801  
— 0.689



<sup>13</sup>C NMR  
(125 MHz, CDCl<sub>3</sub>)







<sup>1</sup>H NMR  
(400 MHz, CDCl<sub>3</sub>)











<sup>1</sup>H NMR  
(400 MHz, CDCl<sub>3</sub>)



<sup>13</sup>C NMR  
(100 MHz, CDCl<sub>3</sub>)







<sup>1</sup>H NMR  
(400 MHz, CDCl<sub>3</sub>)



<sup>13</sup>C NMR  
(100 MHz, CDCl<sub>3</sub>)



























<sup>1</sup>H NMR  
(500 MHz, CDCl<sub>3</sub>)



<sup>13</sup>C NMR  
(125 MHz, CDCl<sub>3</sub>)

























<sup>1</sup>H NMR  
(500 MHz, CDCl<sub>3</sub>)



<sup>13</sup>C NMR  
(125 MHz, CDCl<sub>3</sub>)







— 209.23

— 173.86  
— 169.48

— 88.678

— 72.990

— 55.156

— 44.380

— 43.177

— 42.529

— 37.061

— 30.808

— 26.523

— 21.683

— 18.264
